# Supplementary material for: Genome-wide identification of heat shock factors and heat shock proteins in response to UV and high intensity light stress in lettuce
Source: BMC Plant Biol. 2021 Apr 17;21:185. doi: 10.1186/s12870-021-02959-x (PMC8053295; doi:10.1186/s12870-021-02959-x)
Supplement: Supplementary file 1 — Additional file 1: Table S1. List of LsHsf and LsHsp genes and their physicochemical properties. [file 12870_2021_2959_MOESM1_ESM.xlsx]

## Sheet: Table S1
Family	Subfamily	Gene	Transcript ID	Chromosomal coordination			DNA		Protein
				Chromosome	Start	End	ORF (bp)	Exons	Length (aa)	Cellular localization	MW (kDa)	pI	Instability index		Aliphatic index	Grand average of hydropathicity (GRAVY)
Hsf	Type A	LsHsfA1a	Lsat_1_v5_gn_3_19100.1	LG3	25662749	25665181	1416	2	471	nucl: 13.5, cyto_nucl: 7.5	52.3054	4.81	59.05	unstable	66.43	-0.69
Hsf	Type A	LsHsfA1b	Lsat_1_v5_gn_6_1620.1	LG6	3525752	3527323	978	2	325	chlo: 3, nucl: 3, extr: 3, cyto: 1, mito: 1, vacu: 1, E.R.: 1, cysk: 1	36.147	4.75	47.66	unstable	76.15	-0.438
Hsf	Type A	LsHsfA2	Lsat_1_v5_gn_5_48320.1	LG5	103240724	103242210	1032	2	343	nucl: 14	39.4269	5.1	69.29	unstable	72.71	-0.734
Hsf	Type A	LsHsfA3	Lsat_1_v5_gn_1_50141.1	LG1	59266438	59268015	1140	3	379	nucl: 13.5, cyto_nucl: 7.5	43.2947	5.35	52.24	unstable	74.06	-0.636
Hsf	Type A	LsHsfA4a	Lsat_1_v5_gn_4_26761.1	LG4	39311221	39313351	1116	2	371	nucl: 14	41.9636	6.08	44.27	unstable	69.11	-0.804
Hsf	Type A	LsHsfA4b	Lsat_1_v5_gn_4_48361.1	LG4	70223176	70225597	1008	2	335	nucl: 14	38.5192	5.2	38.16	stable	77.37	-0.689
Hsf	Type A	LsHsfA4c	Lsat_1_v5_gn_7_25320.2	LG7	34215437	34217268	1086	2	361	nucl: 14	41.6102	5.04	54.73	unstable	70.53	-0.8
Hsf	Type A	LsHsfA5	Lsat_1_v5_gn_1_70440.1	LG1	84416543	84418309	1320	2	439	nucl: 14	49.3364	5.23	58.98	unstable	61.34	-0.779
Hsf	Type A	LsHsfA6	Lsat_1_v5_gn_5_142940.1	LG5	273066702	273068460	1149	2	382	nucl: 14	44.6257	5.3	56.94	unstable	72.41	-0.819
Hsf	Type A	LsHsfA7a	Lsat_1_v5_gn_5_185701.1	LG5	332361220	332362512	1044	2	347	nucl: 14	39.518	5.12	66.1	unstable	65.45	-0.79
Hsf	Type A	LsHsfA7b	Lsat_1_v5_gn_8_55640.3	LG8	77032675	77035001	1068	4	355	nucl: 14	41.5804	5.94	55.25	unstable	70.85	-0.717
Hsf	Type A	LsHsfA7c	Lsat_1_v5_gn_9_7580.1	LG9	9674438	9677465	990	2	329	nucl: 14	37.8989	6.13	56.65	unstable	68.72	-0.817
Hsf	Type A	LsHsfA8	Lsat_1_v5_gn_8_35220.1	LG8	47353430	47355369	1074	2	357	chlo: 4, nucl: 4, cyto: 2, E.R.: 2, extr: 1, vacu: 1	41.2744	5	46.59	unstable	73.11	-0.667
Hsf	Type B	LsHsfB1a	Lsat_1_v5_gn_3_90920.1	LG3	136263720	136267315	846	2	281	nucl: 6, chlo: 3, plas: 3, cyto: 1, mito: 1	31.6463	5.22	42.07	unstable	65.48	-0.761
Hsf	Type B	LsHsfB1b	Lsat_1_v5_gn_4_165921.1	LG4	336579920	336581803	822	2	273	nucl: 9, chlo: 3, cyto: 1, mito: 1	30.1898	7.66	38.44	stable	67.14	-0.661
Hsf	Type B	LsHsfB2a	Lsat_1_v5_gn_2_133880.1	LG2	212859303	212861165	1080	2	359	nucl: 13, pero: 1	39.2978	4.98	59.27	unstable	64.93	-0.645
Hsf	Type B	LsHsfB2b	Lsat_1_v5_gn_3_8400.1	LG3	8838718	8840007	771	2	256	nucl: 14	29.303	5.69	63.84	unstable	71.6	-0.633
Hsf	Type B	LsHsfB2c	Lsat_1_v5_gn_8_6800.1	LG8	8653661	8655061	1029	2	342	nucl: 14	38.1766	7.65	58.41	unstable	65	-0.747
Hsf	Type A	LsHsfB3a	Lsat_1_v5_gn_4_52841.1	LG4	79284651	79289070	654	2	217	nucl: 6, mito: 5, cyto: 2, chlo: 1	25.2814	6.6	65.16	unstable	48.53	-1.003
Hsf	Type B	LsHsfB3b	Lsat_1_v5_gn_9_30661.1	LG9	32666256	32667923	735	2	244	nucl: 11, cyto: 2, cysk: 1	28.091	9.42	53.81	unstable	78.61	-0.678
Hsf	Type B	LsHsfB4a	Lsat_1_v5_gn_1_21321.1	LG1	25061181	25062833	1092	2	363	nucl: 14	40.5106	7.35	47.83	unstable	69.23	-0.539
Hsf	Type B	LsHsfB4b	Lsat_1_v5_gn_4_126681.2	LG4	233012149	233014384	1230	5	409	nucl: 13.5, cyto_nucl: 7.5	46.3071	8.29	48.44	unstable	71.25	-0.538
Hsf	Type B	LsHsfB5a	Lsat_1_v5_gn_1_126880.2	LG1	209283330	209285443	1404	3	467	nucl: 8, cyto: 3, chlo: 1, pero: 1, golg: 1	54.0702	8.11	44.79	unstable	76.38	-0.638
Hsf	Type B	LsHsfB5b	Lsat_1_v5_gn_7_19541.1	LG7	25191290	25192161	708	2	235	nucl: 12, extr: 2	27.3931	8.58	53.96	unstable	70.85	-0.723
Hsf	Type B	LsHsfB5c	Lsat_1_v5_gn_7_19561.1	LG7	25208714	25209761	702	2	233	nucl: 10, cysk: 2, chlo: 1, extr: 1	26.7159	5.47	47.58	unstable	73.18	-0.712
Hsf	Type C	LsHsfC1a	Lsat_1_v5_gn_0_11820.1	LG0	33424539	33425427	456	3	151	mito: 5.5, chlo_mito: 5.5, chlo: 4.5, nucl: 3, cyto: 1	17.6167	7.78	51.68	unstable	76.09	-0.419
Hsf	Type C	LsHsfC1b	Lsat_1_v5_gn_4_81660.1	LG4	129990296	129991233	414	3	137	nucl: 14	15.7917	7.94	43.87	unstable	70.36	-0.637
Hsf	Type C	LsHsfC1c	Lsat_1_v5_gn_5_103200.1	LG5	220398995	220400152	933	2	310	nucl: 14	35.4741	5.65	70.58	unstable	64.52	-0.699
Hsf	Type C	LsHsfC1d	Lsat_1_v5_gn_5_172781.1	LG5	315590282	315592055	417	4	138	cyto: 4, chlo: 3, nucl: 3, extr: 2, mito: 1, vacu: 1	15.8446	5.6	47.52	unstable	78.33	-0.439
Hsf	Type C	LsHsfC1e	Lsat_1_v5_gn_6_77581.1	LG6	126836477	126838166	339	3	112	nucl: 14	13.1306	5.69	39.84	stable	81.79	-0.332
Hsf	Type C	LsHsfC1f	Lsat_1_v5_gn_7_40921.1	LG7	57957837	57959198	978	2	325	nucl: 13, pero: 1	36.9735	6.07	67.84	unstable	64.71	-0.723
Hsf	Type C	LsHsfC1g	Lsat_1_v5_gn_8_105120.1	LG8	138832936	138833983	813	2	270	nucl: 13, pero: 1	30.2764	8.96	50.9	unstable	69.3	-0.544
sHsp	sHsp-CI	LsHsp11.8-CI	Lsat_1_v5_gn_2_28040.1	LG2	60210126	60210431	306	1	101	cyto: 5, nucl: 4, extr: 3, chlo: 2	11.7996	9.19	62.72	unstable	73.27	-1.003
sHsp	sHsp-CI	LsHsp17.4-CI	Lsat_1_v5_gn_5_171121.1	LG5	312275379	312276137	465	1	154	cyto: 14	17.4228	6.19	52.16	unstable	73.96	-0.606
sHsp	sHsp-CI	LsHsp17.6-CI	Lsat_1_v5_gn_8_72460.1	LG8	106308752	106309507	468	1	155	cyto: 14	17.649	5.8	44.51	unstable	68.45	-0.693
sHsp	sHsp-CI	LsHsp17.7-CI	Lsat_1_v5_gn_8_72420.1	LG8	106236642	106237502	468	1	155	cyto: 14	17.725	5.81	46.91	unstable	68.45	-0.715
sHsp	sHsp-CI	LsHsp17.8-CI	Lsat_1_v5_gn_5_168220.5	LG5	310591343	310592273	471	1	156	cyto: 14	17.7931	5.5	52.16	unstable	73.01	-0.669
sHsp	sHsp-CI	LsHsp17.9-CI	Lsat_1_v5_gn_2_120060.1	LG2	198795534	198796241	474	1	157	cyto: 13, nucl: 1	17.8512	6.01	59.31	unstable	75.73	-0.687
sHsp	sHsp-CI	LsHsp18.0-CI	Lsat_1_v5_gn_2_28100.1	LG2	60071536	60072009	474	1	157	cyto: 14	17.9853	6.01	58.8	unstable	70.7	-0.735
sHsp	sHsp-CI	LsHsp18.4-CI	Lsat_1_v5_gn_2_28120.2	LG2	60058228	60058775	486	2	161	cyto: 14	18.3858	6.01	57.59	unstable	73.79	-0.675
sHsp	sHsp-CI	LsHsp18.5-CI	Lsat_1_v5_gn_2_120081.1	LG2	198827069	198827951	492	1	163	cyto: 14	18.4997	6.33	39.25	stable	66.87	-0.663
sHsp	sHsp-CI	LsHsp18.9-CI	Lsat_1_v5_gn_2_28080.3	LG2	60081726	60082788	498	2	165	cyto: 14	18.9024	6.02	58.62	unstable	72.61	-0.722
sHsp	sHsp-CI	LsHsp20.6-CI	Lsat_1_v5_gn_2_120040.1	LG2	198762594	198763145	552	1	183	cyto: 10, nucl: 2, plas: 1, extr: 1	20.6383	6.46	47.81	unstable	69.18	-0.663
sHsp	sHsp-CI	LsHsp23.8-CI	Lsat_1_v5_gn_2_28000.1	LG2	60230124	60238681	633	2	210	cyto: 12, nucl: 1, mito: 1	23.8118	4.94	56.19	unstable	74.24	-0.64
sHsp	sHsp-CII	LsHsp18.2-CII	Lsat_1_v5_gn_7_61081.1	LG7	87339065	87339890	492	1	163	cyto: 10, extr: 2, nucl: 1, cysk: 1	18.2299	6.43	40.74	unstable	83.68	-0.49
sHsp	sHsp-CII	LsHsp18.3A-CII	Lsat_1_v5_gn_7_61061.1	LG7	87353755	87354507	495	1	164	cyto: 10, nucl: 2, extr: 2	18.2799	6.1	36.32	stable	80.18	-0.493
sHsp	sHsp-CII	LsHsp18.3B-CII	Lsat_1_v5_gn_7_61041.2	LG7	87367772	87368263	492	1	163	cyto: 9, nucl: 2, extr: 2, chlo: 1	18.2658	6.32	35.3	stable	74.17	-0.586
sHsp	sHsp-CII	LsHsp18.4A-CII	Lsat_1_v5_gn_7_60201.1	LG7	87300140	87300980	492	1	163	cyto: 8, chlo: 2, nucl: 2, extr: 2	18.433	5.97	34.53	stable	77.12	-0.576
sHsp	sHsp-CII	LsHsp18.4B-CII	Lsat_1_v5_gn_7_61001.1	LG7	87431884	87432815	492	1	163	cyto: 10, extr: 2, nucl: 1, cysk: 1	18.3719	6.44	33.18	stable	74.11	-0.634
sHsp	sHsp-CII	LsHsp19.8-CII	Lsat_1_v5_gn_7_60240.1	LG7	87263701	87264509	540	1	179	cyto: 11, chlo: 1, nucl: 1, extr: 1	19.8317	5.98	46.13	unstable	78.94	-0.522
sHsp	sHsp-CIII	LsHsp17.8-CIII	Lsat_1_v5_gn_5_136741.1	LG5	265589627	265590462	486	2	161	nucl: 6, cyto: 3, extr: 2, chlo: 1, plas: 1, cysk: 1	17.7775	6.84	60.24	unstable	88.88	-0.414
sHsp	sHsp-CIII	LsHsp20.7-CIII	Lsat_1_v5_gn_2_123840.3	LG2	203277996	203278597	540	4	179	nucl: 5, extr: 4, cyto: 2, cysk: 2, golg: 1	20.6698	6.45	54.19	unstable	80.5	-0.637
sHsp	sHsp-CIV	LsHsp15.6-CIV	Lsat_1_v5_gn_7_17661.1	LG7	20911348	20912578	414	2	137	cyto: 12, extr: 1, golg: 1	15.6237	5.12	52.59	unstable	73.94	-0.207
sHsp	sHsp-CIV	LsHsp19.2-CIV	Lsat_1_v5_gn_4_59740.2	LG4	90734045	90734850	492	2	163	extr: 6, chlo: 3, cyto: 2, vacu: 2, mito: 1	19.1501	5.27	66.11	unstable	92.09	-0.138
sHsp	sHsp-CV	LsHsp22.0-CV	Lsat_1_v5_gn_7_108120.1	LG7	182866877	182867743	576	2	191	nucl: 5, extr: 5, chlo: 2, cyto: 1, golg: 1	21.9872	5.22	53.15	unstable	74.4	-0.386
sHsp	sHsp-ER	LsHsp21.8-ER	Lsat_1_v5_gn_9_81920.1	LG9	127310806	127311688	579	1	192	extr: 7, vacu: 4, chlo: 1, cyto: 1, mito: 1	21.8364	7.08	46.42	unstable	90.94	-0.482
sHsp	sHsp-ER	LsHsp23.2-ER	Lsat_1_v5_gn_8_130841.1	LG8	203912978	203913797	615	1	204	chlo: 7, extr: 2, vacu: 2, nucl: 1, cyto: 1, E.R.: 1	23.1804	5.26	43.65	unstable	92.65	-0.49
sHsp	sHsp-ER	LsHsp37.6-ER	Lsat_1_v5_gn_9_82001.1	LG9	127437539	127447870	996	2	331	cyto: 5, E.R.: 3, golg: 3, nucl: 1, plas: 1, vacu: 1	37.6186	8.63	49.18	unstable	92.24	-0.319
sHsp	sHsp-MT	LsHsp24.4-M	Lsat_1_v5_gn_3_481.1	LG3	1512141	1513295	648	2	215	chlo: 12, nucl: 1, mito: 1	24.3764	5.48	53.68	unstable	72.93	-0.728
sHsp	sHsp-MT	LsHsp24.6-M	Lsat_1_v5_gn_6_91340.1	LG6	151276376	151277437	648	2	215	chlo: 8, mito: 6	24.5645	5.56	61.23	unstable	67.53	-0.629
sHsp	sHsp-MT	LsHsp25.1-M	Lsat_1_v5_gn_1_33281.3	LG1	38823437	38824325	651	3	216	nucl: 6, mito: 6, cyto: 1, plas: 1	25.0634	7.12	52.06	unstable	68.61	-0.854
sHsp	sHsp-CP	LsHsp26.1-P	Lsat_1_v5_gn_8_4541.1	LG8	5599322	5600369	702	2	233	chlo: 12, mito: 2	26.1486	7.61	48.7	unstable	71.5	-0.65
sHsp	sHsp-CP	LsHsp26.6-P	Lsat_1_v5_gn_8_151001.1	LG8	258515075	258516347	708	2	235	chlo: 11, mito: 2, cyto: 1	26.5952	8.95	39.23	stable	67.19	-0.719
sHsp	sHsp-PX	LsHsp15.6-PX	Lsat_1_v5_gn_3_65081.1	LG3	82992297	82993193	426	2	141	pero: 9, cyto: 2, chlo: 1, nucl: 1, golg: 1	15.6459	6.85	31.12	stable	86.17	-0.345
Hsp60	Cpn60	LsCpn60-1	Lsat_1_v5_gn_4_42920.1	LG4	63116388	63119556	1518	11	505	cyto: 9, chlo: 1, mito: 1, vacu: 1, pero: 1, cysk: 1	54.2795	5.47	27.87	stable	102.89	0.005
Hsp60	Cpn60	LsCpn60-2	Lsat_1_v5_gn_4_153000.1	LG4	303968815	303973616	1605	15	534	cyto: 6, chlo: 5, pero: 2, mito: 1	58.7898	6.16	31.11	stable	100.21	-0.178
Hsp60	Cpn60	LsCpn60-4a	Lsat_1_v5_gn_1_55661.1	LG1	65023574	65028155	1671	13	556	cyto: 9, chlo: 5	60.5849	5.81	35.87	stable	98.94	-0.131
Hsp60	Cpn60	LsCpn60-4b	Lsat_1_v5_gn_6_31340.1	LG6	44161976	44166556	1671	13	556	chlo: 7, cyto: 6, nucl: 1	60.5099	6.03	35.46	stable	99.12	-0.142
Hsp60	Cpn60	LsCpn60-5a	Lsat_1_v5_gn_4_22680.1	LG4	36592784	36596615	1641	17	546	cyto: 11, chlo: 1, pero: 1, cysk: 1	59.1833	5.91	33.8	stable	104.16	-0.057
Hsp60	Cpn60	LsCpn60-5b	Lsat_1_v5_gn_8_34780.1	LG8	45467105	45472273	1641	17	546	cyto: 4, E.R.: 3, golg: 2, chlo: 1, nucl: 1, plas: 1, vacu: 1, pero: 1	59.2303	6.02	31.76	stable	102.75	-0.057
Hsp60	Cpn60	LsCpn60-6	Lsat_1_v5_gn_5_64940.1	LG5	145408451	145412725	1686	14	561	cyto: 7, chlo: 3, extr: 3, vacu: 1	60.6577	6.45	36.83	stable	95.86	-0.078
Hsp60	Cpn60	LsCpn60-7a	Lsat_1_v5_gn_3_23880.1	LG3	33149390	33151949	1584	10	527	cyto: 8, chlo: 4, cysk: 2	57.2182	6.17	30.92	stable	99.64	-0.077
Hsp60	Cpn60	LsCpn60-7b	Lsat_1_v5_gn_5_47521.1	LG5	99945901	99950760	1524	10	507	cyto: 10, chlo: 1, pero: 1, cysk: 1, E.R._vacu: 1	54.7862	5.79	31.06	stable	102.58	-0.019
Hsp60	Cpn60	LsCpn60-8	Lsat_1_v5_gn_5_156500.1	LG5	290337943	290339852	1602	1	533	nucl: 12, cyto: 1, pero: 1	57.6811	7.58	34.8	stable	111.73	0.079
Hsp60	Cpn60	LsCpn60-9a	Lsat_1_v5_gn_4_2661.1	LG4	5176418	5179154	1608	8	535	cyto: 7, chlo: 3, nucl: 1, mito: 1, vacu: 1, cysk: 1	59.0331	5.52	42.9	unstable	96.99	-0.153
Hsp60	Cpn60	LsCpn60-9b	Lsat_1_v5_gn_8_155141.1	LG8	109087679	109091034	1608	9	535	cyto: 5, chlo: 3, cysk: 3, nucl: 1, mito: 1, vacu: 1	59.1211	5.58	46.57	unstable	96.45	-0.189
Hsp60	Cpn60α	LsCpn60α1	Lsat_1_v5_gn_1_63701.1	LG1	76368650	76371434	1767	8	588	chlo: 11, vacu: 1.5, E.R._vacu: 1.5, mito: 1	62.2443	5.04	33.33	stable	105.58	0.004
Hsp60	Cpn60α	LsCpn60α2	Lsat_1_v5_gn_2_63681.1	LG2	134180585	134184462	1752	9	583	plas: 10, chlo: 2, E.R.: 2	62.3465	6.4	32.49	stable	109.38	0.062
Hsp60	Cpn60α	LsCpn60α3	Lsat_1_v5_gn_2_99661.1	LG2	175580026	175582683	1746	6	581	chlo: 14	61.0286	5.38	29.83	stable	104.8	-0.02
Hsp60	Cpn60α	LsCpn60α4	Lsat_1_v5_gn_2_99701.1	LG2	175600237	175602915	1767	7	588	chlo: 14	61.7014	5.02	30.69	stable	104.08	-0.007
Hsp60	Cpn60β	LsCpn60β1	Lsat_1_v5_gn_2_50361.1	LG2	111990240	111993962	1830	11	609	chlo: 13.5, chlo_mito: 7.5	64.6731	5.55	24.03	stable	104.22	-0.051
Hsp60	Cpn60β	LsCpn60β2	Lsat_1_v5_gn_5_134540.1	LG5	261332873	261335502	1812	10	603	chlo: 12, mito: 1, E.R._vacu: 1	64.0664	5.52	29.12	stable	101.19	-0.073
Hsp60	Cpn60β	LsCpn60β3	Lsat_1_v5_gn_8_37600.1	LG8	49402605	49407129	1803	13	600	mito: 7.5, chlo_mito: 6, chlo: 3.5, cyto: 3	65.3988	8.9	28.99	stable	100.4	-0.182
Hsp60	Hsp60	LsHsp60-1	Lsat_1_v5_gn_9_11221.1	LG9	13893495	13897979	1731	18	576	mito: 12, chlo: 2	61.3925	5.46	25.99	stable	100.43	-0.097
Hsp60	Hsp60	LsHsp60-2	Lsat_1_v5_gn_6_63121.1	LG6	90892263	90896454	1740	17	579	mito: 13, chlo: 1	61.761	5.99	26.44	stable	97.18	-0.122
Hsp60	Hsp60	LsHsp60-3	Lsat_1_v5_gn_1_35540.1	LG1	42136478	42143672	2205	18	734	chlo: 6, cyto: 6, pero: 2	79.5486	5.79	28.67	stable	98.41	-0.009
Hsp70	Hsp70	LsHsp70-1	Lsat_1_v5_gn_1_87340.1	LG1	109889258	109895752	1938	1	645	cyto: 6, chlo: 5, extr: 2, nucl: 1	72.0415	5.18	28.87	stable	98	-0.191
Hsp70	Hsp70	LsHsp70-2	Lsat_1_v5_gn_1_90661.1	LG1	111715940	111717930	1764	2	587	chlo: 7, cyto: 2, nucl: 1, extr: 1, vacu: 1, E.R.: 1, mito_plas: 1	65.5537	6.5	31.26	stable	100.92	-0.192
Hsp70	Hsp70	LsHsp70-3	Lsat_1_v5_gn_1_86621.1	LG1	117136700	117138500	1593	4	530	cyto: 12, chlo: 1, mito: 1	58.91	5.33	28.74	stable	99.3	-0.163
Hsp70	Hsp70	LsHsp70-4	Lsat_1_v5_gn_1_92181.1	LG1	119353428	119356172	1632	1	543	pero: 9, nucl: 2, cyto: 2, golg: 1	60.873	8.7	28.5	stable	92.25	-0.377
Hsp70	Hsp70	LsHsp70-5	Lsat_1_v5_gn_1_92141.2	LG1	119432254	119434641	1716	6	571	pero: 13, cyto: 1	63.9236	9.19	23.43	stable	90.79	-0.389
Hsp70	Hsp70	LsHsp70-6	Lsat_1_v5_gn_1_91700.1	LG1	120103664	120109555	1854	2	617	cyto: 10, chlo: 2, nucl: 1, plas: 1	68.7211	8.11	34.19	stable	95.09	-0.259
Hsp70	Hsp70	LsHsp70-7	Lsat_1_v5_gn_1_91041.2	LG1	120483965	120486569	1599	5	532	chlo: 6, cyto: 4, mito: 4	59.7645	6.42	31.71	stable	90.45	-0.337
Hsp70	Hsp70	LsHsp70-8	Lsat_1_v5_gn_1_91141.1	LG1	120850176	120855329	1854	2	617	cyto: 9, chlo: 3, plas: 1, cysk_nucl: 1	68.7366	6.51	33.4	stable	93.66	-0.241
Hsp70	Hsp70	LsHsp70-9	Lsat_1_v5_gn_1_93321.1	LG1	121003736	121009957	1854	3	617	cyto: 7, chlo: 5, nucl: 1, plas: 1	68.4787	7.84	36.53	stable	94.78	-0.251
Hsp70	Hsp70	LsHsp70-10	Lsat_1_v5_gn_1_91241.1	LG1	121066029	121067977	1854	2	617	cyto: 8, chlo: 3, nucl: 2, plas: 1	68.621	7.53	30.19	stable	96.37	-0.224
Hsp70	Hsp70	LsHsp70-11	Lsat_1_v5_gn_1_91301.2	LG1	121354302	121358792	1917	4	638	cyto: 7, chlo: 5, cysk: 1.5, cysk_plas: 1.5	71.7045	6.21	31.26	stable	93.34	-0.299
Hsp70	Hsp70	LsHsp70-12	Lsat_1_v5_gn_1_91381.1	LG1	121852205	121855606	1854	2	617	cyto: 10, chlo: 3, plas: 1	68.5958	8.48	28.14	stable	95.72	-0.254
Hsp70	Hsp70	LsHsp70-13	Lsat_1_v5_gn_2_12780.1	LG2	27582405	27584048	1572	2	523	chlo: 6, cyto: 6, nucl: 1, cysk: 1	57.3365	5.71	31.43	stable	88.18	-0.214
Hsp70	Hsp70	LsHsp70-14	Lsat_1_v5_gn_2_105720.1	LG2	183329796	183331787	1881	2	626	cyto: 7, chlo: 4, nucl: 3	69.709	5.3	37.24	stable	85.19	-0.406
Hsp70	Hsp70	LsHsp70-15	Lsat_1_v5_gn_2_116640.1	LG2	195818061	195820848	1947	2	648	cyto: 9, cysk: 3, chlo: 2	70.8613	5.07	34.27	stable	84.88	-0.379
Hsp70	Hsp70	LsHsp70-16	Lsat_1_v5_gn_3_75000.1	LG3	102351799	102353469	1515	2	504	cyto: 7.5, cyto_nucl: 4.5, chlo: 3, mito: 1, plas: 1, pero: 1	54.9834	5.74	33.31	stable	92.38	-0.144
Hsp70	Hsp70	LsHsp70-17	Lsat_1_v5_gn_4_50420.1	LG4	74953549	74956175	1845	2	614	cyto: 11, nucl: 2, chlo: 1	68.7484	8.32	29.61	stable	85.94	-0.321
Hsp70	Hsp70	LsHsp70-18	Lsat_1_v5_gn_4_59880.2	LG4	90645350	90647460	1689	4	562	cyto: 14	63.0037	9.22	35.38	stable	82.94	-0.378
Hsp70	Hsp70	LsHsp70-19	Lsat_1_v5_gn_4_72580.1	LG4	114717745	114719919	1851	2	616	cyto: 13, nucl: 1	69.0527	8.2	36.11	stable	82.95	-0.354
Hsp70	Hsp70	LsHsp70-20	Lsat_1_v5_gn_4_72600.1	LG4	114729309	114731460	1845	2	614	cyto: 12, nucl: 2	68.7474	8.01	32.75	stable	82.12	-0.336
Hsp70	Hsp70	LsHsp70-21	Lsat_1_v5_gn_4_137301.1	LG4	264836009	264839009	1911	9	636	pero: 13, cyto: 1	70.502	8.28	24.17	stable	91.31	-0.208
Hsp70	Hsp70	LsHsp70-22	Lsat_1_v5_gn_5_89440.1	LG5	198889222	198891498	1950	1	649	cyto: 9, cysk: 3, chlo: 2	71.2197	5.18	31.2	stable	84.45	-0.405
Hsp70	Hsp70	LsHsp70-23	Lsat_1_v5_gn_7_32460.3	LG7	40635117	40637337	1800	3	599	chlo: 4, mito: 3.5, nucl: 3, mito_plas: 2.5, cyto: 2, extr: 1	66.6198	8.97	37.01	stable	84.02	-0.403
Hsp70	Hsp70	LsHsp70-24	Lsat_1_v5_gn_8_15681.1	LG8	20742297	20744706	1956	2	651	cyto: 10, cysk: 3, chlo: 1	71.749	5.58	31.27	stable	86.57	-0.364
Hsp70	Hsp70	LsHsp70-25	Lsat_1_v5_gn_8_78000.1	LG8	111278373	111281032	1947	2	648	cyto: 8, cysk: 4, chlo: 2	71.0985	5.15	34.23	stable	80.82	-0.454
Hsp70	Hsp70	LsHsp70-26	Lsat_1_v5_gn_8_78021.1	LG8	111243940	111246425	1950	2	649	cyto: 10, cysk: 3, chlo: 1	71.1645	5.13	32.6	stable	80.99	-0.443
Hsp70	Hsp70	LsHsp70-27	Lsat_1_v5_gn_8_78100.1	LG8	111121875	111124250	1941	2	646	cyto: 8, cysk: 4, chlo: 1, nucl: 1	70.8642	5.12	33.28	stable	81.53	-0.437
Hsp70	Hsp70	LsHsp70-28	Lsat_1_v5_gn_8_78141.1	LG8	111049781	111052053	1941	2	646	cyto: 8, cysk: 4, chlo: 1, nucl: 1	70.8642	5.12	33.28	stable	81.53	-0.437
Hsp70	Hsp70	LsHsp70-29	Lsat_1_v5_gn_8_103521.1	LG8	156999461	157001747	1833	2	610	cyto: 12, cysk: 2	67.6258	6.47	33.41	stable	89.49	-0.232
Hsp70	Hsp70	LsHsp70-30	Lsat_1_v5_gn_8_103621.3	LG8	157046488	157048043	1533	2	510	cyto: 8, chlo: 2, pero: 2, nucl: 1.5, cysk_nucl: 1.5	56.9466	8.21	35.71	stable	87.88	-0.26
Hsp70	Hsp70	LsHsp70-31	Lsat_1_v5_gn_8_103761.1	LG8	157147690	157149621	1650	4	549	cyto: 9, cysk: 3, chlo: 2	60.8558	7.52	36.36	stable	87.56	-0.298
Hsp70	Hsp70	LsHsp70-32	Lsat_1_v5_gn_8_103821.5	LG8	157242534	157250272	1746	5	581	chlo: 4, nucl: 2.5, cyto: 2, plas: 2, E.R.: 2, cysk_nucl: 2, vacu: 1	64.2519	5.5	31.69	stable	91.74	-0.113
Hsp70	Hsp70	LsHsp70-33	Lsat_1_v5_gn_8_103901.1	LG8	157310375	157312451	1842	2	613	cyto: 8, chlo: 6	68.2294	8.35	39.12	stable	82.53	-0.327
Hsp70	Hsp70	LsHsp70-34	Lsat_1_v5_gn_8_104441.1	LG8	156971101	156973038	1845	2	614	cyto: 10, chlo: 2, nucl: 1, cysk: 1	68.2063	8.47	37.81	stable	85.9	-0.293
Hsp70	Hsp70	LsHsp70-35	Lsat_1_v5_gn_9_22920.1	LG9	25664741	25667640	1944	2	647	cyto: 8, cysk: 4, chlo: 1, nucl: 1	70.8863	5.11	33.85	stable	81.27	-0.429
Hsp70	Hsp70	LsHsp70-36	Lsat_1_v5_gn_9_34760.1	LG9	36912223	36914255	1842	2	613	chlo: 10, cyto: 3, plas: 1	67.7593	5.08	34.81	stable	86.54	-0.236
Hsp70	Hsp70	LsHsp70-37	Lsat_1_v5_gn_9_36480.1	LG9	40736149	40738238	1833	2	610	cyto: 10, cysk: 2, chlo: 1, nucl: 1	67.957	6.2	38.52	stable	84.11	-0.338
Hsp70	Hsp70	LsHsp70-38	Lsat_1_v5_gn_9_36500.1	LG9	40774888	40777338	1743	3	580	cyto: 13, chlo: 1	65.3278	7.07	38.93	stable	85.57	-0.452
Hsp70	Hsp70	LsHsp70-39	Lsat_1_v5_gn_9_36560.1	LG9	40874941	40877358	1908	2	635	cyto: 7, nucl: 2, cysk: 2, chlo: 1, extr: 1, mito_plas: 1	70.8675	8.55	38.14	stable	85.23	-0.363
Hsp70	Hsp70	LsHsp70-40	Lsat_1_v5_gn_9_36600.1	LG9	40892960	40895270	1827	2	608	cyto: 10, nucl: 3, chlo: 1	67.3162	5.73	38.07	stable	85.18	-0.276
Hsp70	Hsp70	LsHsp70-41	Lsat_1_v5_gn_9_36661.2	LG9	40908834	40911749	1761	3	586	cyto: 13, chlo: 1	64.8192	6.18	41.57	unstable	82.56	-0.344
Hsp70	Hsp70	LsHsp70-42	Lsat_1_v5_gn_9_36681.1	LG9	40914391	40916854	1797	2	598	cyto: 9, nucl: 2, chlo: 1, extr: 1, golg: 1	66.065	8.24	40.59	unstable	82.73	-0.311
Hsp70	Hsp70	LsHsp70-43	Lsat_1_v5_gn_9_36701.1	LG9	40946274	40948266	1506	2	501	cyto: 10, chlo: 1, nucl: 1, cysk: 1, golg: 1	55.0874	6.2	39.02	stable	88.92	-0.173
Hsp70	Hsp70	LsHsp70-44	Lsat_1_v5_gn_9_36861.1	LG9	40973005	40975339	1833	2	610	cyto: 5, E.R.: 4, mito: 2, chlo: 1, plas: 1, pero: 1	67.8928	5.56	36.17	stable	84.41	-0.322
Hsp70	Hsp70	LsHsp70-45	Lsat_1_v5_gn_9_36961.3	LG9	41008481	41010785	1722	5	573	cyto: 8, chlo: 4, nucl: 1, golg: 1	63.3025	6.81	28.78	stable	85.65	-0.297
Hsp70	Hsp70	LsHsp70-46	Lsat_1_v5_gn_9_36981.1	LG9	41045214	41047622	1833	2	610	cyto: 11, cysk: 2, nucl: 1	67.7585	8.02	42.87	unstable	81.89	-0.417
Hsp70	Hsp70	LsHsp70-47	Lsat_1_v5_gn_9_65381.1	LG9	83179844	83182255	1944	2	647	cyto: 8, cysk: 5, chlo: 1	70.7911	5.2	34.81	stable	81.11	-0.423
Hsp70	Hsp70t	LsHsp70t-1	Lsat_1_v5_gn_9_81121.1	LG9	114406665	114409209	1710	1	569	cyto: 8, chlo: 4, nucl: 1, cysk: 1	61.6752	5.69	43.06	unstable	103.09	0.069
Hsp70	mtHsc	LsmtHsc70-1	Lsat_1_v5_gn_5_110901.1	LG5	230527526	230530602	2043	6	680	mito: 9, chlo: 5	72.5604	5.78	36.73	stable	87.43	-0.27
Hsp70	mtHsc	LsmtHsc70-2	Lsat_1_v5_gn_9_113681.1	LG9	185253862	185258113	2049	6	682	mito: 12, chlo: 2	72.6344	5.89	37.87	stable	85.56	-0.304
Hsp70	cpHsc	LscpHsc70-1	Lsat_1_v5_gn_5_104601.1	LG5	223025472	223028552	2106	8	701	chlo: 9, mito: 5	74.9948	5.14	29.53	stable	88.59	-0.286
Hsp70	cpHsc	LscpHsc70-2	Lsat_1_v5_gn_6_112621.1	LG6	184461501	184464460	2073	8	690	chlo: 11, mito: 2, nucl: 1	74.0336	5.11	31.23	stable	84.62	-0.335
Hsp70	cpHsc	LscpHsc70-3	Lsat_1_v5_gn_9_119760.1	LG9	195799625	195802427	1704	8	567	cyto: 9, mito: 2, chlo: 1, plas: 1, golg: 1	60.386	4.69	31.03	stable	90.62	-0.271
Hsp70	BiP	LsBiP1	Lsat_1_v5_gn_6_83520.1	LG6	137995822	137998822	1986	6	661	E.R.: 14	72.6154	5.08	31.01	stable	88.37	-0.434
Hsp70	BiP	LsBiP2	Lsat_1_v5_gn_6_83581.1	LG6	137948655	137951645	1872	6	623	plas: 9.5, golg_plas: 7.5, golg: 4.5	69.002	5.84	30.06	stable	89.53	-0.304
Hsp70	Hsp110/SSE	LsHsp70SSE-1	Lsat_1_v5_gn_3_36561.1	LG3	47025787	47032010	2607	14	868	E.R.: 14	96.8357	5.62	38.31	stable	85.84	-0.475
Hsp70	Hsp110/SSE	LsHsp70SSE-2	Lsat_1_v5_gn_4_59541.1	LG4	91001714	91005622	2178	8	725	nucl: 8, cysk: 3, cyto: 2, vacu: 1	81.7732	5.74	47.78	unstable	79.66	-0.496
Hsp70	Hsp110/SSE	LsHsp70SSE-3	Lsat_1_v5_gn_4_173180.2	LG4	350529851	350533657	2085	13	694	cyto: 6, nucl: 4, vacu: 2, mito: 1, cysk_plas: 1	78.4918	6	48.08	unstable	89.61	-0.29
Hsp70	Hsp110/SSE	LsHsp70SSE-4	Lsat_1_v5_gn_5_130141.1	LG5	260037905	260041880	2487	9	828	cyto: 9, chlo: 3, nucl: 1, E.R._vacu: 1	91.6182	5.31	42.02	unstable	78.24	-0.445
Hsp70	Hsp110/SSE	LsHsp70SSE-5	Lsat_1_v5_gn_5_130581.1	LG5	260562214	260566582	2667	9	888	E.R.: 4.5, E.R._plas: 3.5, cyto: 3, nucl: 2, mito: 2, plas: 1.5, vacu: 1	98.3233	5.25	43.2	unstable	77.43	-0.367
Hsp70	Hsp110/SSE	LsHsp70SSE-6	Lsat_1_v5_gn_7_17820.1	LG7	20775244	20779087	2319	9	772	nucl: 10, cyto: 2, chlo: 1, plas: 1	86.9501	6.3	42.3	unstable	86.09	-0.356
Hsp70	Hsp110/SSE	LsHsp70SSE-7	Lsat_1_v5_gn_7_17780.1	LG7	20872267	20875940	2322	9	773	nucl: 8, cyto: 3, chlo: 1, vacu: 1, cysk: 1	87.2731	8.13	41.84	unstable	82.87	-0.362
Hsp70	Hsp110/SSE	LsHsp70SSE-8	Lsat_1_v5_gn_7_17740.1	LG7	20884593	20888287	2193	8	730	nucl: 8, cyto: 3, chlo: 2, vacu: 1	82.2585	5.99	44.25	unstable	84.16	-0.344
Hsp70	Hsp110/SSE	LsHsp70SSE-9	Lsat_1_v5_gn_7_17720.1	LG7	20889469	20892901	2184	8	727	nucl: 8, cyto: 2, chlo: 1, vacu: 1, cysk: 1, golg: 1	82.1362	5.2	44.07	unstable	83.71	-0.392
Hsp90	Group Ia	LsHsp90-1a	Lsat_1_v5_gn_2_131360.1	LG2	211514111	211517220	2115	3	704	cyto: 6, nucl: 2, vacu: 2, mito: 1, plas: 1, E.R.: 1, golg: 1	81.0052	4.97	41.68	unstable	83.22	-0.614
Hsp90	Group Ia	LsHsp90-1b	Lsat_1_v5_gn_8_6561.1	LG8	8439059	8441938	2115	3	704	nucl: 6, cyto: 6, chlo: 1, plas: 1	80.8338	4.95	40.71	unstable	81.82	-0.632
Hsp90	Group Ib	LsHsp90-2a	Lsat_1_v5_gn_9_89140.1	LG9	139306828	139309553	2097	3	698	cyto: 8, nucl: 4, chlo: 2	79.8077	4.94	37.18	stable	84.47	-0.564
Hsp90	Group Ib	LsHsp90-2b	Lsat_1_v5_gn_9_89121.1	LG9	139343068	139345995	2097	3	698	cyto: 8, nucl: 4, chlo: 2	79.8077	4.94	37.18	stable	84.47	-0.564
Hsp90	Group IIa	LsHsp90-5	Lsat_1_v5_gn_4_20860.1	LG4	31303127	31307684	2385	19	794	chlo: 10.5, chlo_mito: 7, mito: 2.5, nucl: 1	90.3418	5	48.21	unstable	78.07	-0.564
Hsp90	Group IIa	LsHsp90-6	Lsat_1_v5_gn_9_104581.1	LG9	168045993	168050863	2385	19	794	mito: 7, chlo_mito: 6.83333, chlo: 5.5, cyto_mito: 4.33333, nucl: 1	90.6792	5.2	40.99	unstable	78.17	-0.584
Hsp90	Group IIb	LsHsp90-7	Lsat_1_v5_gn_8_30781.1	LG8	37848861	37853293	2460	12	819	E.R.: 14	94.1741	4.9	36.46	stable	78.79	-0.715
Hsp100	CplB-Cyt	LsClpB1	Lsat_1_v5_gn_4_110600.1	LG4	192805001	192808616	2748	2	915	cyto: 13, chlo: 1	101.617	5.67	35.95	stable	95.39	-0.404
Hsp100	CplB-Cyt	LsClpB2	Lsat_1_v5_gn_4_116120.1	LG4	204938059	204941822	2742	2	913	cyto: 11, chlo: 2, cysk: 1	101.367	5.85	35.1	stable	96.35	-0.372
Hsp100	ClpB-CP	LsClpB3	Lsat_1_v5_gn_2_87921.1	LG2	166382984	166387500	2946	10	981	chlo: 9, cyto: 2, mito: 2, nucl: 1	110.251	6.2	36.29	stable	90.46	-0.443
Hsp100	ClpB-MT	LsClpB4	Lsat_1_v5_gn_3_21960.1	LG3	31220942	31228006	2910	10	969	mito: 7.5, chlo_mito: 7.5, chlo: 6.5	108.555	6.61	38.26	stable	93.7	-0.411
Hsp100	ClpC	LsClpC1	Lsat_1_v5_gn_1_27961.1	LG1	31639113	31643438	2685	9	894	chlo: 6, cyto: 4, mito: 3, nucl: 1	99.3249	5.82	40.12	unstable	94.24	-0.341
Hsp100	ClpC	LsClpC2	Lsat_1_v5_gn_4_84680.1	LG4	135864959	135869485	2757	9	918	chlo: 8, cyto: 3, vacu: 3	101.941	6.16	40.77	unstable	93.39	-0.353
Hsp100	ClpC	LsClpC3	Lsat_1_v5_gn_5_15861.1	LG5	32701541	32704891	2691	8	896	chlo: 12, cyto: 1, mito: 1	99.7714	6.24	43.02	unstable	92.04	-0.381
Hsp100	ClpD	LsClpD	Lsat_1_v5_gn_4_85180.1	LG4	137022942	137027618	2841	12	946	chlo: 13, cyto: 1	103.858	6.21	43.32	unstable	92.16	-0.24
