# Supplementary material for: Genome-wide identification of heat shock factors and heat shock proteins in response to UV and high intensity light stress in lettuce
Source: BMC Plant Biol. 2021 Apr 17;21:185. doi: 10.1186/s12870-021-02959-x (PMC8053295; doi:10.1186/s12870-021-02959-x)
Supplement: Supplementary file 2 — Additional file 2: Table S2. dNdS ratio between Lettuce genes and Arabidopsis homologs. [file 12870_2021_2959_MOESM2_ESM.xlsx]

## Sheet: dNdS ratio
Family	L. sativa genes	A. thaliana genes	S	N	dS	dN	dN/dS
Hsf	LsHsfA1a	AtHsfA1a	296.6	942.4	7.906	0.3503	0.0443
Hsf	LsHsfA1b	AtHsfA1d	189.2	659.8	4.0979	0.3287	0.0802
Hsf	LsHsfA2	AtHsfA2	227.7	741.3	9.7516	0.3044	0.0312
Hsf	LsHsfA3	AtHsfA3	240.6	800.4	5.4265	0.4126	0.076
Hsf	LsHsfA4a	AtHsfA4c	219.1	782.9	7.8657	0.4302	0.0547
Hsf	LsHsfA4b	AtHsfA4c	192.7	716.3	4.4664	0.3958	0.0886
Hsf	LsHsfA4c	AtHsfA4a	220.4	802.6	58.8552	0.4085	0.0069
Hsf	LsHsfA5	AtHsfA5	296.1	954.9	3.9723	0.3295	0.0829
Hsf	LsHsfA6	AtHsfA6b	208.3	661.7	52.6872	0.5044	0.0096
Hsf	LsHsfA7a	AtHsfA7a	182	592	3.1299	0.2888	0.0923
Hsf	LsHsfA7b	AtHsfA7a	164.6	618.4	3.8295	0.2885	0.0753
Hsf	LsHsfA7c	AtHsfA7a	163.4	580.6	2.9034	0.2715	0.0935
Hsf	LsHsfA8	AtHsfA8	221.7	738.3	6.6183	0.4874	0.0736
Hsf	LsHsfB1a	AtHsfB1	177.9	584.1	4.6615	0.2938	0.063
Hsf	LsHsfB1b	AtHsfB1	174.9	611.1	4.8134	0.309	0.0642
Hsf	LsHsfB2a	AtHsfB2a	194.6	663.4	3.4191	0.3091	0.0904
Hsf	LsHsfB2b	AtHsfB2b	179.1	519.9	2.7725	0.3089	0.1114
Hsf	LsHsfB2c	AtHsfB2a	206.5	660.5	3.3724	0.3187	0.0945
Hsf	LsHsfB3a	AtHsfB3	113.5	429.5	2.7483	0.5755	0.2094
Hsf	LsHsfB3b	AtHsfB3	135.1	428.9	3.9705	0.2936	0.0739
Hsf	LsHsfB4a	AtHsfB4	228.6	701.4	2.9019	0.2376	0.0819
Hsf	LsHsfB4b	AtHsfB4	238.9	697.1	3.3857	0.2704	0.0799
Hsf	LsHsfB5a	AtHsfA9	129.7	455.3	2.9601	0.7109	0.2402
Hsf	LsHsfB5b	AtHsfA6b	135.1	416.9	4.2646	0.7158	0.1678
Hsf	LsHsfB5c	AtHsfA6b	118.7	388.3	2.377	0.6881	0.2895
Hsf	LsHsfC1a	AtHsfC1	54	150	1.7436	0.2103	0.1206
Hsf	LsHsfC1b	AtHsfC1	49.8	154.2	1.3001	0.1821	0.1401
Hsf	LsHsfC1c	AtHsfC1	185.4	657.6	3.2667	0.3062	0.0937
Hsf	LsHsfC1d	AtHsfC1	50.9	153.1	1.396	0.1854	0.1328
Hsf	LsHsfC1e	AtHsfC1	49.8	154.2	1.4007	0.1736	0.1239
Hsf	LsHsfC1f	AtHsfC1	201	663	1.8692	0.3546	0.1897
Hsf	LsHsfC1g	AtHsfC1	193.7	601.3	17.7008	0.3364	0.019
sHsp	LsHsp11.8-CI	AtHsp18.1-Cl	49.8	250.2	77.5705	0.1478	0.0019
sHsp	LsHsp15.6-CIV	AtHsp15.4-ClV	93.5	296.5	3.1918	0.3245	0.1017
sHsp	LsHsp15.6-PX	AtHsp15.7-PX	96.6	275.4	49.3868	0.2422	0.0049
sHsp	LsHsp17.4-CI	AtHsp17.4-Cl	99.2	362.8	8.4209	0.183	0.0217
sHsp	LsHsp17.6-CI	AtHsp17.6B-Cl	102.7	353.3	4.2571	0.1262	0.0296
sHsp	LsHsp17.7-CI	AtHsp17.6B-Cl	107.3	348.7	15.4585	0.1224	0.0079
sHsp	LsHsp17.8-CI	AtHsp17.6B-Cl	109.1	346.9	3.3361	0.1097	0.0329
sHsp	LsHsp17.8-CIII	AtHsp17.4-CIII	117	330	6.0399	0.3053	0.0505
sHsp	LsHsp17.9-CI	AtHsp18.1-Cl	103.3	364.7	9.0626	0.1526	0.0168
sHsp	LsHsp18.0-CI	AtHsp18.1-Cl	99.6	368.4	17.2904	0.1381	0.008
sHsp	LsHsp18.2-CII	AtHsp17.6-CII	103.1	343.9	5.5474	0.1826	0.0329
sHsp	LsHsp18.3A-CII	AtHsp17.6-CII	105.7	341.3	6.3341	0.1915	0.0302
sHsp	LsHsp18.3B-CII	AtHsp17.6-CII	106.6	340.4	6.6027	0.204	0.0309
sHsp	LsHsp18.4A-CII	AtHsp17.6-CII	105.1	341.9	5.9996	0.1926	0.0321
sHsp	LsHsp18.4B-CII	AtHsp17.6-CII	106.5	340.5	5.4106	0.1884	0.0348
sHsp	LsHsp18.4-CI	AtHsp18.1-Cl	101.1	369.9	41.7481	0.1447	0.0035
sHsp	LsHsp18.5-CI	AtHsp17.6C-Cl	98.9	366.1	3.2224	0.186	0.0577
sHsp	LsHsp18.9-CI	AtHsp18.1-Cl	100.1	367.9	15.6308	0.1382	0.0088
sHsp	LsHsp19.2-CIV	AtHsp15.4-ClV	85.6	277.4	3.3661	0.317	0.0942
sHsp	LsHsp19.8-CII	AtHsp17.6-CII	106.9	346.1	2.9088	0.2438	0.0838
sHsp	LsHsp20.6-CI	AtHsp18.1-Cl	103.9	364.1	10.7078	0.1712	0.016
sHsp	LsHsp20.7-CIII	AtHsp17.4-CIII	75	228	7.0769	0.3084	0.0436
sHsp	LsHsp21.8-ER	AtHsp22.0-ER	136	401	50.0417	0.4361	0.0087
sHsp	LsHsp22.0-CV	AtHsp21.7-CV	134.3	387.7	49.5493	0.3349	0.0068
sHsp	LsHsp23.2-ER	AtHsp22.0-ER	135.9	404.1	3.8493	0.2957	0.0768
sHsp	LsHsp23.8-CI	AtHsp18.1-Cl	100.3	370.7	10.8834	0.1433	0.0132
sHsp	LsHsp24.4-M	AtHsp23.6-M	146.8	453.2	2.6179	0.3109	0.1188
sHsp	LsHsp24.6-M	AtHsp23.6-M	155.5	447.5	2.6732	0.42	0.1571
sHsp	LsHsp25.1-M	AtHsp26.5-M	136	455	8.6687	0.479	0.0553
sHsp	LsHsp26.1-P	AtHsp25.4-P	161	499	5.6685	0.3248	0.0573
sHsp	LsHsp26.6-P	AtHsp25.4-P	141.3	488.7	7.1409	0.5756	0.0806
sHsp	LsHsp37.6-ER	AtHsp22.0-ER	136.4	400.6	49.9027	0.4388	0.0088
Hsp60	LsCpn60-1	AtCpn60-1	384.4	1127.6	5.9091	0.1091	0.0185
Hsp60	LsCpn60-2	AtCpn60-2	364.1	1237.9	2.5309	0.0493	0.0195
Hsp60	LsCpn60-4a	AtCpn60-4	380.3	1284.7	4.1414	0.0534	0.0129
Hsp60	LsCpn60-4b	AtCpn60-4	356	1309	9.8428	0.0509	0.0052
Hsp60	LsCpn60-5a	AtCpn60-5	409.8	1216.2	3.454	0.0596	0.0172
Hsp60	LsCpn60-5b	AtCpn60-5	404.4	1221.6	3.2292	0.0785	0.0243
Hsp60	LsCpn60-6	AtCpn60-6	397.5	1270.5	5.2205	0.0488	0.0094
Hsp60	LsCpn60-7a	AtCpn60-7	373.5	1207.5	4.4418	0.0545	0.0123
Hsp60	LsCpn60-7b	AtCpn60-7	354.7	1166.3	5.7577	0.0489	0.0085
Hsp60	LsCpn60-8	AtCpn60-8	400.5	1198.5	6.1815	0.0651	0.0105
Hsp60	LsCpn60-9a	AtCpn60-9	361	1244	4.6165	0.0527	0.0114
Hsp60	LsCpn60-9b	AtCpn60-9	368.2	1236.8	2.1083	0.0529	0.0251
Hsp60	LsCpn60α1	AtCpn60α1	437.6	1305.4	8.3772	0.0877	0.0105
Hsp60	LsCpn60α2	AtCpn60α1	435.5	1256.5	4.4045	0.22	0.0499
Hsp60	LsCpn60α3	AtCpn60α1	459.4	1298.6	6.8727	0.109	0.0159
Hsp60	LsCpn60α4	AtCpn60α2	417	1287	5.5579	0.1816	0.0327
Hsp60	LsCpn60β1	AtCpn60β1	447.7	1352.3	7.2787	0.0927	0.0127
Hsp60	LsCpn60β2	AtCpn60β1	433	1346	7.2996	0.095	0.013
Hsp60	LsCpn60β3	AtCpn60β4	436.2	1327.8	3.8586	0.2089	0.0541
Hsp60	LsHsp60-1	AtHsp60-1	431.5	1293.5	2.26	0.0649	0.0287
Hsp60	LsHsp60-2	AtHsp60-1	425.3	1305.7	3.0811	0.0692	0.0225
Hsp60	LsHsp60-3	AtHsp60-3	418.2	1258.8	5.9104	0.1329	0.0225
Hsp70	LsBiP1	AtBiP1	500	1474	4.3508	0.0465	0.0107
Hsp70	LsBiP2	AtBiP1	472.3	1324.7	3.0783	0.0421	0.0137
Hsp70	LscpHsc70-1	AtcpHsc70-2	493.6	1594.4	5.3016	0.101	0.019
Hsp70	LscpHsc70-2	AtcpHsc70-1	480.1	1520.9	6.0584	0.0944	0.0156
Hsp70	LscpHsc70-3	AtcpHsc70-1	423.9	1271.1	5.2599	0.0624	0.0119
Hsp70	LsHsp70-1	AtHsc70-1	396.7	1172.3	50.4839	0.315	0.0062
Hsp70	LsHsp70-2	AtHsc70-1	454.1	1372.9	51.353	0.3138	0.0061
Hsp70	LsHsp70-3	AtHsc70-1	431.2	1278.8	50.5866	0.328	0.0065
Hsp70	LsHsp70-4	AtHsp70-3	377.5	1158.5	15.6302	0.3204	0.0205
Hsp70	LsHsp70-5	AtHsp70-3	440.5	1371.5	15.1181	0.2979	0.0197
Hsp70	LsHsp70-6	AtHsp70-3	437.6	1380.4	13.8894	0.2856	0.0206
Hsp70	LsHsp70-7	AtHsp70-3	431.2	1392.8	11.283	0.3096	0.0274
Hsp70	LsHsp70-8	AtHsp70-3	439.1	1372.9	12.4284	0.2895	0.0233
Hsp70	LsHsp70-9	AtHsp70-2	441.1	1373.9	49.0641	0.3139	0.0064
Hsp70	LsHsp70-10	AtHsc70-1	396.4	1307.6	22.8339	0.3466	0.0152
Hsp70	LsHsp70-11	AtHsp70b	381.6	1232.4	34.5343	0.3753	0.0109
Hsp70	LsHsp70-12	AtHsp70-3	432.4	1379.6	14.6071	0.2867	0.0196
Hsp70	LsHsp70-13	AtHsp70-3	357.4	1169.6	13.513	0.2648	0.0196
Hsp70	LsHsp70-14	AtHsc70-1	418.1	1384.9	12.9828	0.2536	0.0195
Hsp70	LsHsp70-15	AtHsc70-1	458.5	1485.5	12.1676	0.0686	0.0056
Hsp70	LsHsp70-16	AtHsp70	354.6	1121.4	11.4147	0.2927	0.0256
Hsp70	LsHsp70-17	AtHsc70-1	432.4	1355.6	34.9435	0.2731	0.0078
Hsp70	LsHsp70-18	AtHsc70-1	400.9	1216.1	28.1527	0.2503	0.0089
Hsp70	LsHsp70-19	AtHsc70-1	427.9	1369.1	22.1761	0.2755	0.0124
Hsp70	LsHsp70-20	AtHsc70-1	435.1	1361.9	26.1192	0.279	0.0107
Hsp70	LsHsp70-21	AtHsp70	410.1	1281.9	6.7379	0.3029	0.0449
Hsp70	LsHsp70-22	AtHsp70b	452.2	1479.8	6.6021	0.0892	0.0135
Hsp70	LsHsp70-23	AtHsc70-1	412.7	1333.3	19.3587	0.2744	0.0142
Hsp70	LsHsp70-24	AtHsp70	449.6	1419.4	8.8319	0.0525	0.0059
Hsp70	LsHsp70-25	AtHsp70	443.3	1494.7	6.2275	0.0359	0.0058
Hsp70	LsHsp70-26	AtHsp70	450.3	1490.7	5.0163	0.0403	0.008
Hsp70	LsHsp70-27	AtHsc70-1	447.2	1490.8	14.1049	0.0422	0.003
Hsp70	LsHsp70-28	AtHsc70-1	447.3	1490.7	14.0754	0.0422	0.003
Hsp70	LsHsp70-29	AtHsp70	413.4	1377.6	7.1677	0.2583	0.036
Hsp70	LsHsp70-30	AtHsp70	335.5	1161.5	6.3132	0.2907	0.046
Hsp70	LsHsp70-31	AtHsc70-1	381.4	1238.6	16.571	0.2905	0.0175
Hsp70	LsHsp70-32	AtHsp70	372.3	1184.7	11.0562	0.302	0.0273
Hsp70	LsHsp70-33	AtHsc70-1	440.2	1350.8	30.3821	0.3132	0.0103
Hsp70	LsHsp70-34	AtHsp70	416.7	1374.3	9.8536	0.2714	0.0275
Hsp70	LsHsp70-35	AtHsc70-1	455.8	1485.2	14.9008	0.0433	0.0029
Hsp70	LsHsp70-36	AtHsc70-1	449.3	1377.7	13.0365	0.2066	0.0158
Hsp70	LsHsp70-37	AtHsc70-1	436.8	1375.2	18.7881	0.2549	0.0136
Hsp70	LsHsp70-38	AtHsc70-1	413.6	1275.4	25.1897	0.2541	0.0101
Hsp70	LsHsp70-39	AtHsc70-1	437	1369	21.4095	0.2769	0.0129
Hsp70	LsHsp70-40	AtHsc70-1	439	1373	30.6509	0.2577	0.0084
Hsp70	LsHsp70-41	AtHsc70-1	420.4	1334.6	29.8884	0.2509	0.0084
Hsp70	LsHsp70-42	AtHsc70-1	425.7	1338.3	20.2826	0.2505	0.0123
Hsp70	LsHsp70-43	AtHsc70-1	363.8	1094.2	32.0607	0.2248	0.007
Hsp70	LsHsp70-44	AtHsc70-1	419.2	1389.8	25.5917	0.2528	0.0099
Hsp70	LsHsp70-45	AtHsc70-1	401.7	1299.3	19.0627	0.247	0.013
Hsp70	LsHsp70-46	AtHsc70-1	453.5	1364.5	30.3	0.2696	0.0089
Hsp70	LsHsp70-47	AtHsc70-1	485.7	1452.3	7.2566	0.0663	0.0091
Hsp70	LsHsp70SSE-1	AtHsp70-17	608.3	1920.7	2.7936	0.2003	0.0717
Hsp70	LsHsp70SSE-2	AtHsp70-16	472.1	1690.9	3.9318	0.2408	0.0612
Hsp70	LsHsp70SSE-3	AtHsp70-16	446.4	1521.6	3.7687	0.3283	0.0871
Hsp70	LsHsp70SSE-4	HSP91	571.9	1870.1	3.8535	0.1432	0.0372
Hsp70	LsHsp70SSE-5	HSP91	573.7	1871.3	4.018	0.1424	0.0354
Hsp70	LsHsp70SSE-6	AtHsp70-16	488.4	1665.6	3.0169	0.3321	0.1101
Hsp70	LsHsp70SSE-7	AtHsp70-16	457.5	1600.5	3.7115	0.3485	0.0939
Hsp70	LsHsp70SSE-8	AtHsp70-16	508.7	1756.3	3.4363	0.3658	0.1064
Hsp70	LsHsp70SSE-9	AtHsp70-16	484.5	1738.5	3.1064	0.3798	0.1223
Hsp70	LsHsp70t-1	AtHsp70t-2	449.2	1218.8	7.3244	0.2069	0.0282
Hsp70	LsmtHsc70-1	AtmtHsc70-2	507.2	1532.8	5.11	0.1016	0.0199
Hsp70	LsmtHsc70-2	AtmtHsc70-2	512.1	1527.9	5.6306	0.1046	0.0186
Hsp90	LsHsp90-1a	AtHsp90-1	442.5	1669.5	4.1814	0.0386	0.0092
Hsp90	LsHsp90-1b	AtHsp90-1	408.9	1703.1	3.9325	0.0377	0.0096
Hsp90	LsHsp90-2a	AtHsp90-4	386.6	1704.4	2.6187	0.0484	0.0185
Hsp90	LsHsp90-2b	AtHsp90-4	388.5	1702.5	2.6734	0.0484	0.0181
Hsp90	LsHsp90-5	AtHsp90-5	533.6	1791.4	3.7359	0.1104	0.0296
Hsp90	LsHsp90-6	AtHsp90-6	541.1	1837.9	3.2633	0.1743	0.0534
Hsp90	LsHsp90-7	AtHsp90-7	596.7	1845.3	2.774	0.1092	0.0394
Hsp100	LsClpB1	AtClpB1	644.4	2079.6	3.5348	0.0825	0.0233
Hsp100	LsClpB2	AtClpB1	645.6	2072.4	3.82	0.0851	0.0223
Hsp100	LsClpB3	AtClpB3	670.4	2203.6	3.0834	0.0831	0.0269
Hsp100	LsClpB4	AtClpB4	642.3	2138.7	3.8108	0.1349	0.0354
Hsp100	LsClpC1	AtClpC1	673.7	1978.3	2.2034	0.053	0.0241
Hsp100	LsClpC2	AtClpC1	703.2	1984.8	2.833	0.0728	0.0257
Hsp100	LsClpC3	AtClpC1	671.6	1977.4	2.7738	0.0631	0.0228
Hsp100	LsClpD	AtClpD	687.2	2081.8	2.933	0.1904	0.0649
