# Supplementary material for: Genome-wide identification of heat shock factors and heat shock proteins in response to UV and high intensity light stress in lettuce
Source: BMC Plant Biol. 2021 Apr 17;21:185. doi: 10.1186/s12870-021-02959-x (PMC8053295; doi:10.1186/s12870-021-02959-x)
Supplement: Supplementary file 4 — Additional file 4: Table S4. Multiple EM for Motif Elicitation (MEME) analysis of each gene family. [file 12870_2021_2959_MOESM4_ESM.xlsx]

## Sheet: Hsf
Motif No.	Sequence	E-value	Sites	Width
1	PRYFKHNNFSSFIRQLNTYGFRKIDPDRWEFANEWFLRGQR	3.4e-928	31	41
2	PSTDDIISWSESGNSFIVWDPPEFARDLL	1.4e-369	30	29
3	APPPFLTKTYDMVDD	3.3e-210	29	15
4	LMMEJVRLKQZQQNTEAQLQGMEERLQGTEKRQQQMMSFLAKAAZNPEFL	2.2e-208	16	50
5	HLLKNIKRRKTVSSSSTQN	4e-106	28	19
6	LSDENERLKKENNELRSELAQMKKLCBBLIAFVSNYVK	7.4e-64	11	38
7	CHYLILQKRNPHSSSSLSLIHQEGVDFND	1.2e-29	4	29
8	VNDEFWEZFLTERPGG	1.6e-20	8	16
9	PCVEVGKFGLEEEVERLKRDK	2.4e-14	5	21
10	PSBSGDELYVSSTSSPGSPTPLSVETTA	2e-11	6	28
11	GGGGGA	4.4e-11	15	6
12	SPKLFGVPJGVKRKKE	5.9e-11	8	16
13	PVTPSPPYPFSLLGG	1.1e-06	6	15
14	QVSELEALALEMQGIGRAKRNQEE	5.4e-06	3	24
15	RWMLEKCQRSDR	2.4e-05	4	12
16	PQPIEGLHD	0.00048	6	9
17	MENAIKSTFGZCPHVCCAHM	0.00066	2	20
18	DQFGKFWWNMRSVNNFVDQIGQLAPPERT	0.0018	2	29
19	YGSNNTMVETHKPRLILEKDDLGLKLMPP	0.0039	2	29
20	GRIVKYQPP	0.025	3	9

## Sheet: sHsp
Motif No.	Sequence	E-value	Sites	Width
1	KMEEIKASMEBGVLTVTVPKLEVKKPKVK	1.8e-322	30	29
2	DWKETPEAHVFKADMPGLKKEEVKVEVEEGR	2.2e-411	29	31
3	WHRVERSSGKFLRRFRLPENA	7.5e-272	23	21
4	MSIIPSFFGGRRSSVFDPFSLDIWDPFQGF	1.6e-215	11	30
5	VLQISGERSREHEEK	2.4e-129	23	15
6	SLMGFDTPFFRNLHHILDATDDTTTNNKSSNAGPTRAYVRDARAMAATPA	1.1e-121	5	50
7	SVLNNLPESSRETAAITNARI	1.7e-43	6	21
8	MPMSKMHKITLFALTALIALITISLPTKTEALIPYNRPLWDMMIPAEDPF	5.6e-17	2	50
9	SIDISG	3.6e-11	14	6
10	KTIQVQVA	1.1e-09	5	8
11	FSPARSVSQIFBVMDRFMENPLAYSARGGG	1.5e-08	6	30
12	MZFSTFPPSWQSFFTSPLLFPYPFIPENY	3.6e-08	2	29
13	PGDLDFGGLVIHRLDVPDGIGKIIFPSSRSHHGNGESEGNI	5.1e-07	2	41
14	EWTEESYGRYSSRIDLPEBA	3.4e-05	5	20
15	LEHNPLQLPKNLETINLARA	0.0078	2	20
16	YLIIRTESADDMMIMPGGRSFLKKFRLP	0.4	2	28
17	DASSETSALVNAR	2.8	3	13
18	IAWJNPLNLNQNRHRQPEKGCFINRILQFSGCC	3.1	2	33
19	QESSGGDIKATKTAA	5.1	2	15
20	QCQRTSJKNQQRI	24	3	13

## Sheet: Hsp60
Motif No.	Sequence	E-value	Sites	Width
1	LDIENPGAKLLVZVAKKQBDEAGDGTTTVVVLAGELJKEAE	9.2e-255	24	41
2	IGEMIAEAMDKVGKEGVITIESGKSLENTLEVVEGMKIDRGYISPYFVTN	2.1e-182	10	50
3	EALATLIVNKLRGILKVAAIKAPGFGERRKALLQDIAILTG	6.1e-144	10	41
4	IIDALNVTRAALEEGIVVAGG	1e-135	32	21
5	ANIAGVNALADIVRTTLGPKGRBKVLESS	9.7e-162	22	29
6	RIEQIRKLIENTESDYDKEKLSERIAKLSGGVAVIKVGAATETELKEKKL	2.9e-131	11	50
7	GDEKLGVEIFAKALEAPPKTJAENAGVBG	7.3e-133	22	29
8	VEFENAKVLITDKKISSIKDIIPVLEKALKLGRPLLIIAED	4e-99	10	41
9	LVAAGIHPISIIRGIEKAVKAAVEELKKR	4.5e-93	22	29
10	KENANAGIDVNTGGIADMKELGVFEPYIVKQQIJLLATEAACMILRIDDI	1.7e-101	11	50
11	GABLVITRKGIDDLALHYLADAGILAIRRVRKEDLERIAKATGAEIVSTF	1.5e-93	10	50
12	GSPKVTNDGATILKE	2.3e-74	20	15
13	VISEELGLTLENASVEQLGIAKKVTISKDSTTIVADASSKE	1.5e-66	10	41
14	DKFJYIEGCKTPQACTILLRGANKHMJDEAERS	7.7e-62	10	33
15	DEWEFGYNAATDKYEBLVEAG	7.4e-58	10	21
16	NRESLVKCAKTTLSSKJLSQDKDFFAELAVDAVMAVKDPE	2e-53	9	40
17	KIEKKAGGSLEDSELLKGVILBKDVSHPG	2.5e-37	11	29
18	DCPFEPPKPETKHKVDJDREEDWQVLRKQEEEYFDDLVQQC	1e-32	4	41
19	ENLESEKLGHAGLVEEKKIGD	5e-13	12	21
20	RRRFSVNAAAKDIAFDKDGRA	4.1e-19	10	21

## Sheet: Hsp70
Motif No.	Sequence	E-value	Sites	Width
1	AYFNDSQRQATKDAGNIAGLNVLRIINEP	1.3e-1395	96	29
2	FKRKHKKDJTGNKRALGRLRVACEKAKRILSSTTQTSIEJDCLHEGIDFS	1.2e-1681	59	50
3	GKKNVJGFDLGGGTFDVSVLT	2.7e-1121	99	21
4	TRAKFEELNMDLFRKCIEPVEKCLRDAKMNKSDVBEVVLVG	6.1e-1325	61	41
5	GSTRIPKVQQLLQDFFNGKELCKSINPDEAVAYGAAVLAAK	1.5e-1343	45	41
6	IPRNTPIPTKKEKVFSTYSDNQTSVLIKVYQGERTRSTDNN	7.0e-1152	49	41
7	GTFEVKAVAGDTHLGGEDFDNRMVBHFVZ	6.2e-1062	58	29
8	KRLIGRRFSDSKVQEDMKLWPFKVIEGPA	4.7e-957	56	29
9	KLKDVAELSLGKEVKDAVITV	3.6e-828	111	21
10	EKKRLSAEEISSMVL	1.2e-544	105	15
11	PQIEVCFEIDANGILNVSAEILSTGKKNKJTITN	9.4e-666	43	34
12	EIIPNDQGNRTTPSC	5.6e-519	57	15
13	YKKKAEARNALEDYIYBMKNK	1.0e-461	50	21
14	DLKKMEDAIEDAIEWLDENQLAEVDEYZDKKKZLEGVCNPI	1.7e-430	32	41
15	TAAAIAYGLDK	1.2e-340	61	11
16	LGKFEJSGIPPAPRG	1.6e-328	39	15
17	RLIGEGAKNQAAMNPTNTIFD	3.9e-242	36	21
18	SRIPAVQEKLTSJFGKEPMRTLNPSECVARGCALQCAILSP	4e-202	13	41
19	DAEKYKLEDZE	4.5e-198	49	11
20	DTPKIVVSYKG	5.9e-184	42	11

## Sheet: Hsp90
Motif No.	Sequence	E-value	Sites	Width
1	PEYLSFVKGVVDSWDLPLNVSREMLQQNKILKVIRK	2.9e-128	12	36
2	DSPCCLVTGEYGWSANMERIMKAQALRDSSMAGYMSSKKTMEINPDNPIM	5.2e-147	6	50
3	IGQFGVGFYSAYLVADKVTVTTKHNKEEQ	7.5e-114	14	29
4	MADVETFEFQAEINQLLSLIINTFYSNKEIFLRELISNSSDALDKJRFES	2.2e-161	10	50
5	YVTRMKEGQKDIYYITGESKKAVENSPFLEKLKKKGIEVLYMVDAIDEYA	1.7e-118	7	50
6	RAEADKNDKSVKDLVLLLFETALLTSGFSLEDPNTFGGRIHRMLKLGLSI	8.8e-91	7	50
7	EYLEERRJKDLVKKHSEFISYPIYLWTEKTTEKEISDDED	1.3e-77	7	40
8	KKKTIKEVSHEWELINKQKPIWLRKPEEI	7.7e-68	7	29
9	TNKKPNNIKLYVRRVFIMDBC	4.6e-53	7	21
10	DESEEEKQKQEELKEEFENLCKTIKDILGDKVEKVVVSDRI	1.5e-43	6	41
11	LTDKSKLDGQPELFIRIIPDK	2e-25	6	21
12	ENREDYEKFWENFGKHIKLGCIEDAGNHKRLAPLLRFFSSKSEEELISLD	2.2e-17	3	50
13	VGQLKEFEGKKLVSATKEGLK	5e-17	5	21
14	VPKRAPFDLFD	7.4e-14	5	11
15	YIWESQAGGSFTVTRDVDGEPLGRGTKIT	2.6e-13	3	29
16	IITIRDSGIGMTKEELIDSLGTIAQSGTSKF	3.7e-10	3	31
17	EAJTAGADVSM	8.3e-08	4	11
18	YNEFYKKTFNEFLEPLAHSHFTTEGEVEFRSIJYIPGMAPM	4.8e-07	2	41
19	EEEKKDEEGKMEEVD	1.1e-05	8	15
20	QYIWEGEAESDSYIIREETDPEKFIRRG	0.088	2	28

## Sheet: Hsp100
Motif No.	Sequence	E-value	Sites	Width
1	RRPKNNPVFIGPTGVGKTEJAEGLAQRJF	3.3e-188	16	29
2	MSEYMEQHTVSRLIGIPPGYVGYEEGGQL	2.2e-153	14	29
3	PYTVVLFDEIEKAHPDVFNMLLQILEDGRLTDSQGRTVDFTNTLIIMTSN	2.4e-202	8	50
4	MDAANLLKPMLARGELRCIGATTLDEYRKYIEKDPALERRFQPVKVPEPS	2e-167	8	50
5	ILRGLRERYEIHHGVRYTDEALVAAAQLSSRYISDRFLPDKAIDLVDEAG	6.2e-163	8	50
6	RFTEKAKKVJELAQEEARRLGHNYVGTEHJLLGLJREGEGIAARVLKNLG	3.1e-145	12	50
7	YERIKSLVMEELKQYFRPEFLNRLDEMIVFRPLTKLZIKEIADJQLKEVF	4.4e-109	8	50
8	LKVTERLHDRIVEQGYDPSYGARPIRRAI	9.1e-71	12	29
9	DVPETJEGKKVISLDMGLLIAGAKYRGEF	2.1e-70	8	29
10	NLTKLAEEGKLDPVIGRDEEIERVIQILS	3.3e-60	8	29
11	QVILFIDEIHTVVGAGAGGGA	1.5e-47	13	21
12	VRLREKQLPEEIRELEKEREQLTVELQEAEREYDLARAAEL	4.2e-53	9	41
13	MMASVQSPPMRVRTFSGLRGTNALDNJVKRPQDFHSKV	1.8e-23	3	38
14	LEDRLHQRVVGQDQAVNAVAEAVLRSRAG	6.1e-14	4	29
15	MDLKTQISALVDKNKEMSKAETEAGEEGP	1.4e-13	3	29
16	SLIKLIRRARSYKKERGDTHLAVDQLILGFLEDSRFGEQLF	1.1e-11	4	41
17	IDENSTVFIDAEMNGEELSYRAERNGGVVNAATGEKSDVLIQVVNANGN	5.3e-09	2	49
18	SVIEKGGRRIGFDLDYDEKDS	7e-09	3	21
19	MRLLEDSMAEKMLAREIKEGD	1.3e-07	3	21
20	INLKDARVEVEKIIGRGSGFV	5e-06	3	21
