# Supplementary material for: Genome-wide identification of heat shock factors and heat shock proteins in response to UV and high intensity light stress in lettuce
Source: BMC Plant Biol. 2021 Apr 17;21:185. doi: 10.1186/s12870-021-02959-x (PMC8053295; doi:10.1186/s12870-021-02959-x)
Supplement: Supplementary file 7 — Additional file 7: Table S7. Cis-regulatory element analysis present in 2-kb promoter regions of LsHsf and LsHsp genes. [file 12870_2021_2959_MOESM7_ESM.xlsx]

## Sheet: Table S4
Family	Gene	3-AF1 binding site	AAAC-motif	ACE	AE-box	AT1-motif	ATC-motif	ATCT-motif	Box 4	Box II	CAG-motif	G-box	GA-motif	GATA-motif	GT1-motif	GTGGC-motif	Gap-box	I-box	L-box	LAMP-element	MRE	Sp1	TCCC-motif	TCT-motif	chs-CMA1a	chs-CMA2a	chs-CMA2b	chs-Unit 1 m1	sbp-CMA1c	ARE	DRE core	DRE1	GC-motif	HSE	LTR	MBS	TC-rich repeats	W box	WUN-motif	ABRE	ABRE2	ABRE3a	ABRE4	AuxRE	AuxRR-core	CGTCA-motif	ERE	GARE-motif	P-box
Hsf	LsHsfA1a	0	0	0	0	0	0	0	1	0	0	0	0	0	0	0	0	0	0	0	0	1	0	1	1	0	0	0	0	2	0	0	0	0	2	2	1	3	0	0	0	0	0	0	0	0	0	0	0
Hsf	LsHsfA1b	0	0	1	1	0	0	1	0	0	0	2	0	1	4	0	0	0	1	0	1	0	0	4	0	0	0	0	0	7	0	0	0	0	0	0	1	1	0	1	0	0	0	0	1	0	0	0	0
Hsf	LsHsfA2	1	0	0	0	0	0	0	2	0	0	3	0	2	1	0	0	0	0	0	0	0	0	2	0	0	0	0	0	2	0	0	0	0	0	0	0	1	1	4	0	0	0	1	0	0	4	0	0
Hsf	LsHsfA3	1	0	0	0	0	0	0	0	0	0	1	0	0	0	1	0	0	0	0	1	2	0	1	1	0	0	0	0	3	0	0	0	0	1	0	1	3	0	1	0	0	0	0	0	1	3	0	0
Hsf	LsHsfA4a	0	0	0	0	0	2	0	12	0	0	0	0	0	3	0	0	1	0	0	2	0	0	2	0	0	0	0	0	0	0	0	0	0	0	1	0	0	0	1	0	0	0	0	0	0	2	0	0
Hsf	LsHsfA4b	0	0	0	0	0	0	0	2	0	0	1	0	1	2	0	0	0	0	0	0	0	0	1	1	0	0	0	0	5	0	0	0	0	1	0	0	0	3	1	0	0	0	0	0	2	0	0	0
Hsf	LsHsfA4c	0	0	0	0	0	0	0	1	0	0	3	1	1	3	0	0	0	0	1	0	0	0	0	0	0	0	0	0	2	0	0	0	0	1	0	2	2	4	2	0	0	0	0	0	2	1	0	0
Hsf	LsHsfA5	0	0	0	0	0	0	0	0	0	0	3	0	0	1	0	0	0	0	0	1	0	0	1	0	0	0	0	0	5	0	0	0	0	1	2	0	1	1	3	0	0	0	0	0	2	4	0	1
Hsf	LsHsfA6	0	0	1	0	1	0	0	1	0	0	1	0	0	2	0	1	0	0	0	0	0	0	1	0	0	0	0	0	5	0	0	0	0	2	0	1	1	2	2	0	0	0	0	0	1	0	0	1
Hsf	LsHsfA7a	0	0	0	2	0	0	0	3	0	0	4	0	1	0	0	0	1	0	0	0	0	0	1	0	0	0	0	0	1	0	0	0	0	0	0	2	2	0	3	0	0	0	0	0	1	1	2	0
Hsf	LsHsfA7b	0	0	0	2	0	0	0	7	0	0	2	1	2	1	0	0	2	0	0	2	0	0	2	0	0	0	0	0	2	0	0	0	0	0	1	0	0	1	1	0	0	0	0	1	1	3	0	0
Hsf	LsHsfA7c	0	0	2	1	0	0	0	2	0	0	2	0	2	1	0	0	0	0	0	1	0	0	1	0	0	0	0	0	5	0	0	0	0	0	1	2	1	0	3	0	1	1	0	0	2	1	0	0
Hsf	LsHsfA8	0	0	0	2	0	0	0	5	0	0	1	0	0	2	0	0	0	0	0	0	0	0	1	0	0	0	0	0	0	0	0	0	0	1	1	1	2	1	1	0	0	0	0	0	3	1	0	0
Hsf	LsHsfB1a	0	0	0	0	0	0	1	0	0	0	1	0	0	3	0	0	0	0	0	1	0	0	1	1	0	0	0	0	8	0	0	0	0	3	0	0	0	2	0	0	0	0	0	0	1	0	0	0
Hsf	LsHsfB1b	0	0	0	1	0	0	0	2	0	0	0	1	1	1	0	0	0	0	0	0	0	0	0	1	0	0	0	0	1	0	0	0	0	0	1	0	0	0	0	0	0	0	0	0	2	0	0	0
Hsf	LsHsfB2a	0	0	0	1	0	0	1	5	0	0	0	0	1	2	0	0	3	0	0	0	0	0	0	0	1	0	0	0	2	0	0	0	0	0	0	1	0	0	1	0	0	0	0	0	0	2	0	0
Hsf	LsHsfB2b	0	0	0	1	0	0	0	2	0	0	1	0	0	2	0	0	0	0	0	1	0	1	0	1	0	0	0	0	5	1	0	0	0	0	1	0	1	0	0	0	0	0	0	0	1	0	0	2
Hsf	LsHsfB2c	1	0	1	1	0	0	0	6	0	0	2	0	1	0	0	0	2	0	0	0	0	0	0	1	0	0	0	0	0	0	1	0	0	0	0	0	1	2	3	0	1	1	0	0	2	2	0	0
Hsf	LsHsfB3a	0	0	1	0	1	0	0	3	0	0	0	0	2	2	0	0	0	0	0	0	0	0	3	0	0	0	0	0	2	0	0	0	0	0	0	0	1	3	0	0	0	0	0	0	1	7	0	0
Hsf	LsHsfB3b	0	0	0	0	0	0	0	1	0	0	3	1	0	0	0	2	0	0	0	0	0	0	0	0	0	0	0	0	1	0	0	0	0	0	0	1	1	1	2	0	0	0	0	0	0	2	0	0
Hsf	LsHsfB4a	0	0	0	0	0	0	0	2	0	0	1	0	1	0	0	0	0	0	0	1	0	0	1	0	0	0	0	0	6	0	0	0	0	0	0	1	0	0	0	0	0	0	0	0	4	0	1	1
Hsf	LsHsfB4b	0	0	0	1	0	0	0	6	0	0	2	1	0	1	0	0	0	0	0	0	0	0	1	0	0	0	0	0	2	0	0	0	0	0	0	2	0	0	3	0	1	1	0	1	1	7	0	0
Hsf	LsHsfB5a	0	0	0	0	0	0	0	6	0	0	2	1	0	2	0	1	0	0	0	0	0	0	0	1	0	0	0	0	4	0	0	0	0	0	1	0	1	0	0	0	0	0	0	0	0	1	0	0
Hsf	LsHsfB5b	0	0	1	0	1	0	0	7	0	0	0	0	0	3	0	0	0	0	0	0	0	0	1	1	0	0	0	0	1	0	0	0	0	0	1	1	1	1	0	0	0	0	0	0	0	5	0	0
Hsf	LsHsfB5c	0	0	1	4	0	0	0	6	0	0	4	0	0	0	0	0	1	0	0	0	0	0	0	1	0	0	0	0	5	0	0	0	0	1	0	0	0	0	4	0	1	1	0	0	1	8	0	0
Hsf	LsHsfC1a	0	0	0	1	0	0	0	3	0	0	2	0	0	5	0	0	1	0	0	2	1	0	0	0	0	0	0	0	2	0	1	0	0	2	0	1	1	1	2	0	0	0	0	0	1	0	0	0
Hsf	LsHsfC1b	0	0	0	0	0	0	0	1	0	0	0	0	1	0	0	0	0	0	1	0	0	0	0	0	0	0	0	0	0	0	0	1	0	1	1	0	2	0	1	0	0	0	0	0	0	1	0	0
Hsf	LsHsfC1c	0	0	0	1	0	0	0	7	0	0	0	1	1	2	0	0	0	0	0	0	0	0	1	0	0	0	0	0	1	0	0	0	0	0	0	1	0	1	0	0	0	0	0	0	1	1	0	0
Hsf	LsHsfC1d	0	0	1	0	0	0	0	1	0	0	6	0	0	2	1	0	1	0	0	1	0	0	1	0	0	0	0	0	5	0	0	0	0	1	0	0	1	0	4	0	1	1	0	0	2	0	1	0
Hsf	LsHsfC1e	0	0	0	1	0	0	1	5	0	0	4	0	1	1	0	0	1	0	1	1	0	0	0	0	0	0	0	0	1	0	0	0	0	2	1	0	0	1	2	0	2	2	0	0	1	0	0	0
Hsf	LsHsfC1f	0	0	0	0	0	0	0	0	0	0	0	0	0	2	0	0	0	0	0	0	0	0	0	0	0	0	0	0	4	0	0	0	0	3	0	0	0	0	0	0	0	0	0	0	0	0	0	2
Hsf	LsHsfC1g	0	0	1	0	0	0	0	8	0	0	1	1	0	3	0	0	0	0	0	1	0	0	1	0	0	0	0	0	1	0	0	0	0	0	0	1	0	0	1	0	0	0	0	0	1	4	0	2
sHsp	LsHsp11.8-CI	0	0	0	1	0	0	0	0	1	0	1	0	1	0	0	0	0	0	0	0	0	0	1	0	0	0	0	0	4	0	0	0	0	0	1	0	6	1	6	0	0	0	0	1	0	2	0	0
sHsp	LsHsp17.4-CI	1	0	0	0	0	0	1	1	0	0	1	0	0	5	0	0	0	0	0	0	0	0	0	0	0	0	0	0	2	1	0	0	0	3	1	0	0	0	1	0	1	1	0	0	0	1	0	1
sHsp	LsHsp17.6-CI	0	0	0	0	0	0	0	4	0	0	3	0	1	0	0	0	0	0	0	0	0	0	1	1	0	0	0	0	0	0	0	0	0	2	0	0	0	0	5	0	3	3	0	0	1	2	0	0
sHsp	LsHsp17.7-CI	0	0	0	1	0	0	0	1	0	0	5	2	1	4	0	0	1	0	0	1	0	0	0	0	0	0	0	0	1	0	0	0	0	0	0	0	0	0	5	0	1	1	0	0	0	0	0	0
sHsp	LsHsp17.8-CI	0	0	0	0	0	0	1	0	0	0	2	0	1	0	0	0	2	0	0	0	0	0	0	0	0	0	0	0	6	1	0	0	0	0	0	0	0	0	3	0	2	2	0	0	0	3	0	0
sHsp	LsHsp17.9-CI	0	1	1	0	0	0	0	0	1	0	0	0	0	1	0	0	0	0	0	0	7	0	0	0	0	0	0	0	3	0	0	0	0	5	1	1	0	1	0	0	0	0	0	0	2	0	0	0
sHsp	LsHsp18.0-CI	0	0	0	0	0	0	0	4	0	0	0	0	1	2	0	0	2	0	0	0	0	0	0	0	0	0	1	0	2	1	0	0	1	0	0	0	0	0	2	0	0	0	0	1	3	4	1	0
sHsp	LsHsp18.4-CI	0	0	0	0	0	0	0	1	0	0	1	0	1	0	0	0	2	0	0	1	0	0	0	0	0	0	1	0	2	0	0	0	1	0	0	0	0	0	2	0	0	0	0	1	2	1	1	0
sHsp	LsHsp18.5-CI	0	0	4	0	0	0	0	0	0	0	1	1	0	1	0	0	1	0	0	0	0	0	3	0	0	0	0	0	2	0	0	0	0	1	0	0	1	0	1	0	0	0	0	0	0	0	0	0
sHsp	LsHsp18.9-CI	0	0	0	0	0	1	0	2	0	0	2	1	0	0	0	0	3	0	0	0	0	0	0	0	0	0	0	0	1	0	0	0	0	0	0	0	0	1	3	0	0	0	0	0	0	1	1	0
sHsp	LsHsp20.6-CI	0	0	0	0	0	0	0	0	0	0	2	1	2	1	0	0	1	0	0	0	0	0	2	0	0	0	0	0	2	0	0	0	0	3	1	1	1	0	0	0	0	0	0	1	1	0	0	2
sHsp	LsHsp23.8-CI	0	0	0	0	0	0	0	2	0	0	4	0	0	3	0	0	2	0	0	1	0	0	2	0	1	0	0	0	2	0	0	1	1	1	0	0	1	1	5	0	1	1	0	1	1	2	2	1
sHsp	LsHsp18.2-CII	0	0	0	0	0	0	0	1	1	0	7	1	3	1	0	1	1	0	0	0	0	0	1	0	0	0	0	0	5	2	0	0	0	0	0	0	2	0	5	0	0	0	0	1	3	1	0	0
sHsp	LsHsp18.3A-CII	1	0	1	0	0	0	0	0	0	0	3	0	3	5	0	1	1	0	0	0	1	0	2	0	0	0	0	0	3	1	0	1	0	0	0	0	3	0	2	0	1	1	0	1	2	0	0	0
sHsp	LsHsp18.3B-CII	0	0	1	1	1	0	0	2	0	0	0	0	0	1	0	0	0	0	1	0	0	0	2	0	0	0	0	0	3	0	0	0	0	0	0	0	0	0	0	0	0	0	0	0	1	1	0	0
sHsp	LsHsp18.4A-CII	0	0	0	0	0	1	0	1	0	0	5	0	0	0	0	0	0	0	0	0	0	0	1	0	0	0	0	0	1	0	0	0	0	2	0	0	2	1	5	0	1	1	0	0	2	1	2	0
sHsp	LsHsp18.4B-CII	0	0	0	0	0	0	0	2	0	0	0	0	0	2	0	0	0	0	0	3	0	0	0	1	0	0	0	0	0	0	0	0	0	0	0	0	2	1	0	0	0	0	0	0	2	0	0	0
sHsp	LsHsp19.8-CII	0	0	0	0	0	0	0	3	0	0	6	0	0	2	0	0	3	0	0	1	0	0	3	0	0	0	0	0	1	0	0	0	0	2	0	0	0	0	4	0	2	2	0	0	4	0	0	0
sHsp	LsHsp17.8-CIII	0	0	0	0	0	0	0	2	0	0	8	0	0	2	0	0	0	0	0	0	1	0	0	0	0	0	0	0	1	0	0	0	0	0	0	0	0	0	7	0	3	3	0	1	2	0	0	0
sHsp	LsHsp20.7-CIII	0	0	0	1	1	0	0	1	0	0	1	0	0	0	0	0	1	0	0	0	0	1	1	0	0	0	0	0	0	0	0	1	0	0	1	1	0	0	1	0	0	0	0	1	1	1	0	2
sHsp	LsHsp15.6-CIV	0	1	0	1	0	0	1	2	0	0	1	0	2	0	0	0	0	0	0	0	0	0	0	0	0	0	1	0	2	0	0	0	0	0	0	1	0	0	2	0	0	0	0	1	0	0	1	0
sHsp	LsHsp19.2-CIV	0	0	0	0	0	0	0	7	0	0	0	0	1	1	0	0	0	0	0	0	0	0	0	0	0	0	0	0	1	0	0	1	0	1	0	0	3	3	2	0	0	0	0	1	1	1	0	0
sHsp	LsHsp22.0-CV	0	0	0	1	0	0	0	4	0	0	2	0	1	1	0	0	3	0	0	2	0	0	0	0	0	0	0	0	1	0	0	0	0	0	1	1	0	2	2	0	0	0	0	0	1	1	1	0
sHsp	LsHsp21.8-ER	0	0	0	0	0	1	0	2	0	0	1	0	0	3	0	0	0	0	0	0	0	0	0	1	0	0	0	0	1	0	0	0	0	0	0	0	0	0	0	0	0	0	0	0	0	2	0	0
sHsp	LsHsp23.2-ER	0	0	0	0	0	0	0	1	1	0	2	0	0	0	0	1	0	1	0	1	0	1	0	0	0	0	0	0	6	0	0	0	0	1	0	0	2	1	2	0	1	1	0	0	1	1	0	3
sHsp	LsHsp37.6-ER	0	1	0	1	0	0	0	6	0	0	0	0	0	6	0	0	1	0	0	4	0	0	1	0	0	0	0	0	3	0	0	0	0	0	0	2	1	0	0	0	0	0	0	0	0	2	0	1
sHsp	LsHsp24.4-M	0	0	0	0	0	1	1	9	0	0	7	0	0	0	0	0	1	0	0	0	0	1	1	0	0	0	0	0	4	0	0	0	0	2	0	1	0	1	8	0	0	0	0	1	1	4	0	0
sHsp	LsHsp24.6-M	0	0	0	0	0	0	1	4	0	0	5	0	0	0	0	0	0	0	0	1	0	0	1	0	0	0	0	0	3	0	0	1	0	1	1	0	1	0	5	0	2	2	0	0	1	1	0	1
sHsp	LsHsp25.1-M	0	0	0	3	1	0	0	3	0	0	0	1	0	1	0	0	0	0	0	0	0	0	0	0	1	0	0	0	0	0	0	0	0	1	1	0	0	0	0	0	0	0	0	0	1	2	0	0
sHsp	LsHsp26.1-P	0	0	1	1	0	0	0	1	0	0	1	1	3	2	0	0	1	0	0	0	0	1	1	0	0	0	0	0	5	0	0	0	0	1	0	0	0	0	1	0	1	1	0	0	0	1	0	0
sHsp	LsHsp26.6-P	0	0	0	3	1	0	0	4	0	0	2	0	2	2	0	0	0	0	1	0	1	0	1	0	0	0	0	0	3	0	1	0	0	0	0	1	0	1	0	0	0	0	0	0	1	3	0	1
sHsp	LsHsp15.6-PX	0	0	0	1	0	0	0	2	0	0	0	0	3	2	0	1	1	0	1	0	0	1	2	0	1	0	0	0	4	0	0	0	0	1	0	0	0	3	0	0	0	0	0	1	1	5	0	1
Hsp60	LsCpn60-1	0	0	1	1	0	0	1	2	1	0	1	0	0	0	0	0	0	0	0	1	1	0	0	0	0	0	0	0	6	1	0	0	0	1	0	0	1	0	1	0	0	0	0	0	3	2	1	1
Hsp60	LsCpn60-2	0	0	0	0	0	0	0	8	0	0	8	0	1	1	0	0	0	1	0	0	0	0	1	0	0	0	0	0	2	1	0	0	0	7	0	0	0	2	5	0	0	0	0	0	4	0	0	1
Hsp60	LsCpn60-4a	0	0	0	1	0	0	0	1	0	0	1	0	0	1	0	0	0	0	0	1	0	0	0	1	0	0	0	0	3	0	0	0	0	0	1	0	1	0	1	0	1	1	0	0	0	1	0	0
Hsp60	LsCpn60-4b	0	0	1	0	0	0	0	0	0	0	4	0	0	1	0	0	0	0	0	1	0	0	0	1	0	0	0	0	1	0	0	0	0	1	0	1	0	1	5	0	0	0	0	2	0	1	1	0
Hsp60	LsCpn60-5a	0	0	0	0	0	0	0	0	0	0	6	0	0	2	0	0	0	0	1	0	0	1	0	0	0	0	0	0	4	0	0	0	0	0	0	1	1	0	6	0	1	1	0	0	3	4	0	1
Hsp60	LsCpn60-5b	0	0	0	0	0	0	0	2	0	0	0	0	0	3	0	0	0	0	0	0	0	0	0	0	0	0	0	0	1	0	0	0	0	0	1	1	0	1	1	0	0	0	0	0	1	2	0	0
Hsp60	LsCpn60-6	0	0	0	0	0	0	0	5	0	1	1	0	0	0	0	0	0	0	0	0	0	0	0	0	0	0	0	0	1	0	1	0	0	1	0	0	0	0	1	0	0	0	0	0	2	0	0	1
Hsp60	LsCpn60-7a	0	0	1	2	0	0	0	0	0	0	2	0	0	0	0	0	0	0	0	2	0	0	0	0	0	0	0	0	5	0	0	0	0	1	1	0	1	0	1	0	0	0	0	0	0	1	2	0
Hsp60	LsCpn60-7b	0	0	1	0	0	0	0	4	0	0	4	0	0	0	0	0	0	0	0	1	0	1	0	0	1	0	0	0	2	0	0	0	0	2	1	0	1	2	3	0	0	0	0	0	2	2	0	1
Hsp60	LsCpn60-8	0	0	0	0	0	0	0	6	0	0	0	1	0	5	0	1	0	0	0	0	0	0	0	0	0	0	0	0	2	0	0	0	0	1	1	0	0	2	0	0	0	0	0	0	0	4	0	0
Hsp60	LsCpn60-9a	0	0	0	0	0	0	0	6	0	0	1	0	1	1	0	0	1	0	0	2	1	0	0	0	1	0	0	0	2	0	0	0	0	0	1	0	0	0	1	0	0	0	0	0	0	1	0	2
Hsp60	LsCpn60-9b	0	0	0	0	0	0	0	1	0	1	2	0	2	0	0	1	0	0	0	0	0	0	0	0	1	0	0	0	5	0	0	0	0	1	0	0	2	1	2	0	0	0	0	0	0	0	0	0
Hsp60	LsCpn60α1	0	0	0	1	0	0	0	1	0	0	1	1	0	0	0	0	0	0	0	0	0	0	0	0	0	0	0	0	2	0	0	0	0	0	1	0	2	2	1	0	0	0	0	0	1	0	1	0
Hsp60	LsCpn60α2	0	0	0	0	0	0	0	2	0	0	0	0	0	1	0	0	0	0	0	1	0	1	0	0	0	0	0	0	8	0	0	0	0	0	1	0	2	2	0	0	0	0	0	0	1	2	0	0
Hsp60	LsCpn60α3	0	0	0	0	0	0	1	0	0	0	2	0	0	2	0	0	0	0	0	2	0	0	2	0	0	0	0	0	1	0	0	0	0	0	0	1	2	2	1	0	1	1	0	0	2	0	0	0
Hsp60	LsCpn60α4	0	0	0	1	0	1	0	2	0	0	1	1	0	1	0	0	2	0	0	3	0	0	1	0	0	0	0	0	1	0	0	0	0	0	1	1	1	1	1	0	1	1	0	1	5	2	0	0
Hsp60	LsCpn60β1	0	0	0	0	0	0	0	6	0	0	2	1	1	2	0	0	0	0	0	0	0	2	2	0	0	0	0	0	1	0	0	0	0	2	2	0	0	0	0	0	0	0	0	0	1	0	1	1
Hsp60	LsCpn60β2	0	0	1	1	0	0	1	2	0	0	0	0	2	2	0	0	2	0	0	0	0	0	2	0	0	0	0	0	2	1	0	0	0	0	1	1	0	0	1	0	0	0	0	0	4	0	0	1
Hsp60	LsCpn60β3	1	0	1	0	0	0	0	0	0	0	1	0	2	0	0	0	2	0	1	2	1	0	1	0	0	0	0	0	1	0	0	0	0	0	1	0	0	0	1	0	1	1	0	1	0	1	0	0
Hsp60	LsHsp60-1	0	0	1	0	0	0	0	1	0	0	1	0	0	12	0	0	0	0	0	2	0	0	1	0	0	0	0	0	4	0	0	0	0	0	2	0	1	1	1	0	0	0	0	0	4	1	0	0
Hsp60	LsHsp60-2	0	0	2	0	0	0	0	2	0	0	1	0	0	2	0	0	0	0	0	1	0	0	0	0	0	0	0	0	3	0	0	0	0	5	0	0	0	1	1	0	1	1	0	0	1	7	0	0
Hsp60	LsHsp60-3	0	0	1	0	0	0	0	1	0	0	0	0	2	0	0	0	1	0	1	1	0	1	1	0	0	0	0	0	5	0	0	0	0	0	0	1	0	2	0	0	0	0	0	0	0	0	1	0
Hsp70	LsHsp70-1	0	0	0	0	0	0	1	2	0	0	0	0	0	2	0	0	0	0	0	1	1	0	0	0	0	0	0	1	1	1	0	0	0	0	0	1	0	0	0	0	0	0	0	0	1	0	0	1
Hsp70	LsHsp70-2	0	0	0	0	0	0	0	0	0	0	0	0	0	0	0	0	0	0	0	0	0	0	1	0	0	0	0	0	0	0	0	0	0	0	1	0	1	0	0	0	0	0	0	0	0	2	0	1
Hsp70	LsHsp70-3	0	0	0	1	0	0	1	0	0	0	2	0	0	1	0	0	1	0	0	1	0	1	2	0	0	0	0	0	3	0	0	0	0	0	0	1	2	1	3	0	0	0	0	0	1	3	0	1
Hsp70	LsHsp70-4	0	0	0	1	0	0	0	8	0	0	1	0	1	0	0	0	0	0	0	0	0	0	3	1	0	0	0	0	4	0	0	0	0	0	1	3	2	0	1	0	0	0	0	1	1	8	0	1
Hsp70	LsHsp70-5	0	0	0	1	0	0	0	2	0	0	1	0	0	0	0	0	2	0	0	0	1	0	0	0	0	0	0	0	1	1	0	0	0	1	1	2	4	1	1	0	0	0	0	0	0	3	0	0
Hsp70	LsHsp70-6	0	0	0	2	0	0	0	2	0	0	1	0	2	3	0	0	0	0	0	0	0	0	1	0	0	0	0	0	2	1	0	0	0	1	0	0	0	0	1	0	0	0	1	1	1	0	0	1
Hsp70	LsHsp70-7	0	0	0	0	0	0	0	3	0	0	5	0	0	2	0	0	0	0	0	1	1	0	2	0	0	0	0	0	2	0	0	0	0	0	0	1	0	1	5	0	1	1	0	0	4	1	0	0
Hsp70	LsHsp70-8	0	0	0	2	0	0	0	2	0	0	4	0	0	0	0	0	1	0	0	0	0	0	0	0	0	0	0	0	4	0	0	0	0	2	0	0	1	0	3	0	1	1	0	0	0	1	0	0
Hsp70	LsHsp70-9	0	0	1	2	0	0	1	2	0	0	2	0	0	3	0	0	0	0	0	2	0	0	1	0	0	0	0	0	2	0	0	0	0	0	0	0	1	1	2	0	0	0	0	0	1	2	0	0
Hsp70	LsHsp70-10	1	0	0	2	0	0	0	2	0	0	0	1	0	0	0	0	0	0	0	0	0	0	2	0	0	0	0	0	0	0	0	0	0	0	0	0	0	0	0	0	0	0	0	0	0	2	0	0
Hsp70	LsHsp70-11	0	0	0	0	0	0	0	10	0	0	0	0	0	12	0	0	0	0	0	0	0	0	0	0	1	0	0	0	6	0	0	0	0	2	0	0	0	0	0	0	0	0	0	0	0	3	0	0
Hsp70	LsHsp70-12	0	0	0	1	0	0	0	5	0	0	0	0	0	3	0	0	0	0	0	1	0	0	1	0	0	0	0	0	3	0	0	0	0	2	0	0	0	1	1	0	0	0	0	0	0	1	2	2
Hsp70	LsHsp70-13	0	0	0	1	0	0	0	1	0	0	3	0	2	1	0	0	1	0	0	0	0	1	0	0	0	0	0	0	1	0	0	0	0	2	3	1	1	0	3	0	1	1	0	0	1	1	1	0
Hsp70	LsHsp70-14	0	0	1	0	0	0	0	1	0	0	3	2	1	0	0	0	1	0	0	0	0	0	3	0	1	0	0	0	1	0	0	0	0	0	1	0	0	0	3	0	0	0	0	0	1	2	0	0
Hsp70	LsHsp70-15	0	0	0	1	0	0	0	2	0	0	6	0	0	0	0	0	0	0	0	1	0	0	1	0	0	0	0	0	6	2	0	0	0	1	0	0	7	1	6	0	4	4	0	0	0	0	0	0
Hsp70	LsHsp70-16	0	0	1	1	0	0	1	1	0	0	2	1	0	2	0	0	1	0	0	0	0	2	1	0	0	0	0	0	6	0	0	0	0	0	2	1	0	0	1	0	1	1	0	0	0	0	0	1
Hsp70	LsHsp70-17	0	0	0	0	0	0	0	1	1	0	8	1	0	2	0	0	0	0	1	1	0	0	2	0	0	0	0	0	2	0	0	0	0	0	0	1	1	0	5	0	1	1	0	0	1	1	1	2
Hsp70	LsHsp70-18	0	0	0	1	0	0	0	2	0	0	4	0	0	1	0	0	0	0	0	1	1	0	1	0	0	0	0	0	4	0	0	0	0	3	0	1	1	0	5	0	1	1	0	0	3	2	0	0
Hsp70	LsHsp70-19	0	0	0	0	0	0	0	2	0	0	5	0	1	0	0	0	0	0	0	0	0	1	0	0	1	0	0	0	3	1	0	0	0	0	1	0	0	0	3	0	0	0	0	0	5	0	0	0
Hsp70	LsHsp70-20	0	0	0	0	0	0	2	3	0	0	4	0	4	0	0	0	0	0	0	0	0	1	1	0	0	0	0	0	1	0	0	0	0	0	0	0	1	0	5	0	1	1	0	0	4	2	0	0
Hsp70	LsHsp70-21	0	0	1	1	0	0	0	1	0	0	1	0	1	0	0	0	0	0	0	0	0	0	1	0	0	0	0	0	3	0	2	0	0	1	1	0	1	1	0	0	0	0	0	0	0	1	0	0
Hsp70	LsHsp70-22	0	0	0	0	0	0	0	18	0	1	2	0	0	2	0	0	1	0	0	0	0	0	2	0	0	0	0	0	0	0	0	0	0	1	1	0	1	0	3	0	0	0	0	0	2	0	0	0
Hsp70	LsHsp70-23	0	0	0	0	0	0	0	2	0	0	3	0	0	4	0	0	1	0	0	0	0	0	0	0	0	0	0	0	0	0	0	1	0	7	0	1	3	0	2	0	0	0	0	0	4	3	0	0
Hsp70	LsHsp70-24	0	0	0	0	0	0	2	1	0	0	2	0	0	1	0	0	0	0	0	1	0	0	0	0	0	0	0	0	4	0	0	0	0	1	2	0	1	1	0	0	0	0	0	0	2	1	0	0
Hsp70	LsHsp70-25	0	0	0	0	0	0	1	2	0	0	1	0	0	1	0	0	0	0	0	0	0	0	0	0	0	0	0	0	2	0	0	0	0	0	0	0	1	0	1	0	0	0	0	0	1	0	0	0
Hsp70	LsHsp70-26	0	0	0	3	0	0	0	6	2	0	7	1	0	1	0	1	1	0	0	1	1	0	1	1	0	0	0	0	2	0	0	0	0	0	0	1	1	1	6	1	0	0	0	0	1	3	0	1
Hsp70	LsHsp70-27	0	0	0	0	0	0	0	2	0	0	0	0	0	6	0	0	0	0	0	2	0	0	0	0	1	0	0	0	3	1	0	1	0	0	0	0	1	0	0	0	0	0	0	0	0	0	0	0
Hsp70	LsHsp70-28	0	0	0	0	0	0	0	0	0	0	0	0	1	0	0	0	0	0	0	0	0	0	1	0	0	0	0	1	0	1	1	0	0	1	0	0	1	0	0	0	0	0	0	1	3	0	0	0
Hsp70	LsHsp70-29	0	0	0	0	0	0	1	1	0	0	3	0	0	3	0	0	1	0	0	0	0	2	2	0	0	0	0	0	3	0	0	1	0	1	0	1	0	0	2	0	1	1	0	0	1	1	0	1
Hsp70	LsHsp70-30	0	0	0	0	0	0	0	2	0	0	3	0	0	6	0	0	0	0	0	2	0	0	1	1	0	0	0	0	2	0	0	0	0	2	0	0	1	1	2	0	0	0	0	0	1	3	0	0
Hsp70	LsHsp70-31	0	0	0	1	0	0	0	2	0	0	1	0	0	0	0	0	0	0	0	0	0	0	0	0	0	0	0	0	3	0	1	0	0	1	0	1	2	0	2	0	0	0	0	0	1	0	0	0
Hsp70	LsHsp70-32	0	0	0	1	0	0	0	1	0	0	2	0	4	0	0	0	0	0	0	1	0	0	0	0	0	0	0	0	2	3	0	0	0	0	0	0	2	1	3	0	0	0	0	0	1	0	0	0
Hsp70	LsHsp70-33	0	0	0	1	0	1	0	4	0	0	2	1	1	0	0	0	1	0	0	1	0	0	1	0	0	0	0	0	0	0	0	0	0	0	1	1	0	1	2	0	1	1	0	0	3	0	0	0
Hsp70	LsHsp70-34	0	0	0	1	0	0	0	0	0	0	18	0	1	0	0	0	1	0	0	1	0	0	1	0	0	0	0	0	6	0	0	1	0	3	0	0	0	2	3	0	0	0	0	0	1	0	0	1
Hsp70	LsHsp70-35	0	0	0	1	0	0	0	0	0	0	1	1	0	0	0	0	1	0	1	0	1	0	0	0	0	0	0	0	1	0	0	0	0	7	1	0	1	1	2	0	0	0	0	0	1	0	0	1
Hsp70	LsHsp70-36	0	0	0	0	0	0	0	2	0	0	5	0	0	1	0	0	0	0	0	1	0	0	0	0	0	0	0	0	6	0	0	0	0	1	1	0	1	3	5	0	1	1	0	0	2	0	0	0
Hsp70	LsHsp70-37	1	0	0	0	0	1	0	2	0	0	3	1	1	1	0	0	1	0	0	1	0	0	1	0	0	0	0	0	5	0	0	0	0	6	1	0	4	0	1	0	0	0	0	1	3	1	0	0
Hsp70	LsHsp70-38	2	0	0	0	0	0	0	1	0	0	2	0	0	1	0	0	3	0	0	0	0	0	0	0	0	0	0	0	4	0	0	0	0	0	1	1	0	0	2	0	0	0	0	1	2	2	0	0
Hsp70	LsHsp70-39	0	0	0	1	0	0	0	0	0	0	6	0	0	2	0	0	0	0	0	0	0	0	0	0	1	0	0	0	3	0	0	0	0	1	1	0	0	0	6	0	1	1	0	0	1	2	0	0
Hsp70	LsHsp70-40	0	0	0	0	0	1	0	4	0	0	1	0	0	3	0	0	0	0	0	0	0	0	2	2	0	0	0	0	5	0	0	0	0	3	0	0	1	0	1	0	0	0	0	1	4	0	0	1
Hsp70	LsHsp70-41	0	0	1	0	0	0	0	2	0	0	1	0	0	0	0	0	2	0	0	0	0	0	0	1	0	0	0	0	3	0	0	0	0	1	2	0	0	0	0	0	0	0	0	0	3	0	0	1
Hsp70	LsHsp70-42	0	0	3	0	0	0	0	2	1	0	0	0	0	1	0	0	0	0	0	0	3	0	1	1	0	0	0	0	2	0	0	1	0	1	0	1	1	2	0	0	0	0	0	0	0	5	0	1
Hsp70	LsHsp70-43	0	1	0	1	0	1	0	1	0	0	0	0	1	3	0	0	0	0	0	2	0	0	2	0	0	0	0	1	3	0	0	0	0	0	1	1	0	1	0	0	0	0	0	0	0	0	0	1
Hsp70	LsHsp70-44	0	0	0	0	0	0	0	0	0	0	3	0	0	2	0	0	0	0	0	0	0	0	0	0	0	0	0	0	2	0	0	0	0	0	1	0	1	1	3	0	0	0	0	0	4	2	0	0
Hsp70	LsHsp70-45	0	0	0	1	0	0	1	3	0	0	3	0	1	1	0	0	0	0	0	0	0	0	0	0	0	0	0	0	0	0	0	0	0	0	0	1	1	0	1	0	0	0	0	0	1	3	1	0
Hsp70	LsHsp70-46	0	0	0	0	0	0	0	3	0	0	1	0	0	0	0	0	1	0	0	0	0	0	1	0	0	0	0	0	2	0	0	0	0	0	1	0	1	0	2	0	1	1	0	0	0	2	0	0
Hsp70	LsHsp70-47	0	0	0	1	0	0	1	1	0	0	4	0	0	3	0	0	0	0	0	0	1	0	2	0	0	0	0	0	0	2	0	0	0	0	2	0	2	1	2	0	0	0	0	0	0	1	0	1
Hsp70	LsHsp70t-1	0	0	0	0	0	0	0	0	0	0	0	0	0	5	1	0	2	0	0	0	0	0	1	1	0	0	0	0	5	1	0	0	0	2	0	1	4	0	1	0	0	0	0	1	0	1	0	0
Hsp70	LsmtHsc70-1	0	0	0	1	0	0	0	3	0	0	2	0	0	4	0	0	0	0	1	3	0	0	1	0	1	0	0	0	0	0	0	0	0	0	0	0	0	1	2	0	2	2	0	0	0	0	0	0
Hsp70	LsmtHsc70-2	0	0	0	0	0	0	0	2	0	0	3	0	0	0	0	1	0	0	0	0	0	2	2	0	0	0	0	0	2	0	0	0	0	0	2	0	0	0	2	0	0	0	0	0	2	1	0	0
Hsp70	LscpHsc70-1	0	0	0	0	0	0	0	2	0	0	1	0	0	1	0	0	0	0	0	1	0	0	0	0	0	0	0	0	8	0	0	1	0	0	1	0	1	0	1	0	0	0	0	0	1	0	0	1
Hsp70	LscpHsc70-2	0	0	0	0	0	0	0	0	0	0	1	0	2	1	0	0	2	0	0	1	0	1	1	0	0	0	0	0	1	0	0	0	0	2	1	1	0	1	1	0	0	0	0	0	0	3	1	0
Hsp70	LscpHsc70-3	0	0	0	0	0	0	0	0	0	0	3	0	0	3	0	0	0	0	0	2	1	0	1	1	0	0	1	0	2	0	0	0	0	1	0	1	0	1	3	0	1	1	0	0	0	0	0	0
Hsp70	LsBiP1	0	0	0	0	3	0	0	8	0	0	2	0	1	0	0	0	0	0	0	0	0	0	0	0	0	0	0	0	3	0	0	0	0	0	0	0	0	0	2	0	1	1	0	1	2	1	0	0
Hsp70	LsBiP2	0	0	0	0	0	0	0	0	0	0	5	0	0	2	0	0	0	0	0	0	0	0	0	0	0	0	0	0	4	0	0	0	0	0	2	0	1	1	5	0	2	2	0	0	2	2	0	0
Hsp70	LsHsp70SSE-1	0	0	0	0	0	0	0	4	0	0	6	0	1	0	0	0	0	0	0	0	0	0	4	0	0	0	0	0	2	0	0	0	0	0	1	0	1	1	3	0	2	2	0	0	0	1	0	1
Hsp70	LsHsp70SSE-2	0	0	0	0	1	0	0	2	0	0	2	0	1	2	0	0	0	0	0	0	0	0	3	0	0	0	0	0	1	0	0	0	0	0	0	2	2	2	0	0	0	0	0	0	1	2	0	0
Hsp70	LsHsp70SSE-3	0	0	0	1	0	0	0	3	0	0	3	0	1	0	0	0	0	0	0	2	0	0	1	0	0	0	0	0	2	0	0	0	0	1	0	0	0	0	2	0	0	0	0	0	3	1	0	0
Hsp70	LsHsp70SSE-4	0	0	0	1	0	0	0	5	0	0	0	0	0	2	0	1	0	0	0	1	0	0	1	1	1	0	0	0	2	0	0	0	0	3	1	1	0	1	0	0	0	0	0	0	1	1	0	0
Hsp70	LsHsp70SSE-5	0	0	2	1	0	0	0	5	0	0	0	0	0	0	0	1	0	0	0	2	0	0	0	0	0	0	0	0	2	0	0	0	0	2	0	0	4	0	0	0	0	0	0	0	0	0	0	0
Hsp70	LsHsp70SSE-6	0	0	2	0	0	1	1	2	0	0	6	0	0	0	0	0	2	0	0	0	0	0	0	0	0	0	0	0	2	1	0	0	0	0	3	0	1	1	5	0	2	2	0	1	2	1	0	1
Hsp70	LsHsp70SSE-7	0	0	1	0	0	0	0	2	0	0	3	0	0	0	0	0	0	0	0	0	0	0	1	0	0	0	0	0	2	1	0	0	0	2	1	0	0	1	3	0	0	0	0	0	1	0	0	0
Hsp70	LsHsp70SSE-8	0	0	0	1	1	1	0	0	0	0	3	0	0	3	0	0	0	0	0	2	0	0	1	0	0	0	0	0	5	0	0	0	0	1	2	0	1	0	2	0	0	0	0	0	1	1	0	0
Hsp70	LsHsp70SSE-9	0	0	1	1	0	0	0	3	0	0	2	0	1	2	0	0	0	0	0	0	1	0	1	0	0	0	0	0	4	0	0	0	0	0	0	0	1	2	2	0	0	0	0	0	0	2	0	0
Hsp90	LsHsp90-1a	0	1	0	0	0	0	0	1	0	0	4	0	2	1	0	0	1	0	0	1	0	0	1	0	0	0	0	0	2	0	0	1	0	0	0	0	1	1	2	0	0	0	0	1	2	1	1	1
Hsp90	LsHsp90-1b	0	0	0	0	0	0	0	1	0	0	1	0	1	0	0	0	0	0	0	0	0	0	0	0	0	0	0	0	2	0	0	0	0	2	0	1	1	1	1	0	0	0	0	0	1	2	1	2
Hsp90	LsHsp90-2a	1	0	0	1	0	0	0	3	0	0	0	0	0	0	0	0	0	0	0	0	0	0	1	0	0	0	0	0	3	0	0	0	0	0	1	2	0	3	0	0	0	0	0	0	2	1	0	0
Hsp90	LsHsp90-2b	0	0	0	0	0	0	0	4	0	0	0	0	1	0	0	0	0	0	0	1	0	0	0	1	0	0	0	0	3	0	0	0	0	4	0	1	0	0	0	0	0	0	0	3	1	1	0	0
Hsp90	LsHsp90-5	0	0	0	0	0	0	0	0	0	0	2	0	2	1	0	0	0	0	1	0	0	0	2	1	0	0	0	0	1	1	0	0	0	1	0	1	2	0	3	0	0	0	0	0	4	0	0	1
Hsp90	LsHsp90-6	0	0	0	1	0	0	0	1	0	0	0	0	0	0	0	0	0	0	0	0	0	0	0	0	0	0	0	0	4	0	0	0	0	0	0	1	4	0	0	0	0	0	0	0	0	2	0	1
Hsp90	LsHsp90-7	0	0	0	0	1	0	0	2	0	0	6	0	1	4	0	0	1	0	0	1	0	0	0	0	0	0	1	0	1	0	0	1	0	1	0	1	1	0	4	0	1	1	0	1	0	2	0	0
Hsp100	LsClpB1	0	0	0	0	0	0	0	1	1	0	1	0	1	3	0	0	1	0	0	0	0	0	1	0	0	0	0	0	6	1	0	0	0	1	1	3	0	0	1	0	1	1	0	0	2	1	0	1
Hsp100	LsClpB2	0	0	0	0	0	0	0	0	0	0	2	0	1	0	0	0	0	0	0	0	0	0	0	0	0	0	0	0	10	1	0	0	0	0	0	0	3	2	2	0	0	0	0	0	1	0	0	0
Hsp100	LsClpB3	0	0	0	0	0	0	1	0	0	0	7	0	1	1	0	0	5	0	1	0	1	1	2	0	0	0	0	0	2	1	0	0	0	1	0	1	2	1	6	0	0	0	0	0	2	0	0	1
Hsp100	LsClpB4	0	0	0	0	0	0	0	3	0	0	7	1	1	2	0	0	0	0	0	0	0	0	2	1	0	1	0	0	2	0	0	1	0	1	0	0	2	0	4	0	0	0	0	1	3	0	0	1
Hsp100	LsClpC1	0	0	0	1	0	0	0	1	0	0	2	0	0	1	0	0	1	0	0	0	0	0	3	0	0	0	0	0	1	0	0	1	0	0	1	2	1	2	2	0	2	2	0	0	3	0	0	1
Hsp100	LsClpC2	0	0	0	0	0	0	0	2	0	0	2	0	0	2	0	0	0	0	0	1	0	0	0	1	0	0	0	0	5	0	0	0	0	1	0	1	1	1	2	0	0	0	0	1	1	2	0	2
Hsp100	LsClpC3	0	0	0	1	0	0	0	1	0	0	1	0	1	1	0	0	1	0	0	0	0	0	0	0	1	0	0	0	3	0	0	0	0	0	1	1	1	1	1	0	1	1	0	0	1	0	0	0
Hsp100	LsClpD	0	0	0	0	0	0	1	8	0	0	2	2	0	1	0	0	1	0	0	0	1	0	1	1	0	0	0	0	3	0	0	0	0	0	0	0	2	0	2	0	0	0	0	0	3	2	0	1
[truncated: 11 more columns]
